# Supplementary material
Source: Research Square preprint supplement (doi:10.21203/rs.3.rs-6562222/v1)
Supplement: Supplementary file 1 [file 4619697363b89354078df4e3.xlsx]

## Sheet: Supplementary Table 1
Supplementary Table 1. Kinome profiling of HQY1027 (1 µM)
Kinases	Score (%)
AAK1	95
ABL1-nonphosphorylated	52
ABL1-phosphorylated	63
ABL2	100
ACVR1	72
ACVR1B	84
ACVR2A	77
ACVR2B	64
ACVRL1	78
ADCK3	82
ADCK4	93
AKT1	89
AKT2	100
AKT3	87
ALK	100
AMPK-alpha1	91
AMPK-alpha2	84
ANKK1	83
ARK5	79
ASK1	100
ASK2	56
AURKA	96
AURKB	84
AURKC	100
AXL	64
BIKE	82
BLK	67
BMPR1A	75
BMPR1B	82
BMPR2	100
BMX	86
BRAF	100
BRK	81
BRSK1	94
BRSK2	66
BTK	100
BUB1	80
CAMK1	87
CAMK1B	100
CAMK1D	94
CAMK1G	100
CAMK2A	79
CAMK2B	72
CAMK2D	97
CAMK2G	93
CAMK4	100
CAMKK1	97
CAMKK2	94
CASK	78
CDC2L1	88
CDC2L2	69
CDC2L5	90
CDK11	96
CDK2	90
CDK3	86
CDK4	76
CDK4-cyclinD1	78
CDK4-cyclinD3	76
CDK5	91
CDK7	100
CDK8	91
CDK9	88
CDKL1	48
CDKL2	85
CDKL3	81
CDKL5	100
CHEK1	83
CHEK2	69
CIT	89
CLK1	87
CLK2	82
CLK3	76
CLK4	65
CLK4	65
CSF1R	90
CSF1R	90
CSF1R-autoinhibited	100
CSK	80
CSNK1A1	81
CSNK1A1L	92
CSNK1D	86
CSNK1E	97
CSNK1G1	81
CSNK1G2	74
CSNK1G3	94
CSNK2A1	100
CSNK2A2	91
CTK	100
DAPK1	68
DAPK2	75
DAPK3	82
DCAMKL1	76
DCAMKL2	68
DCAMKL3	92
DDR1	76
DDR2	60
DLK	64
DMPK	79
DMPK2	77
DRAK1	94
DRAK2	78
DYRK1A	96
DYRK1B	46
DYRK2	100
EGFR	85
EIF2AK1	100
EPHA1	97
EPHA2	86
EPHA3	87
EPHA4	95
EPHA5	87
EPHA6	97
EPHA7	75
EPHA8	74
EPHB1	75
EPHB2	72
EPHB3	99
EPHB4	95
EPHB6	95
ERBB4	80
ERK1	83
ERK2	90
ERK3	81
ERK4	87
ERK5	90
ERK8	92
ERN1	100
FAK	93
FER	86
FES	94
FGFR1	88
FGFR2	84
FGFR3	74
FGFR4	96
FGR	100
FLT1	72
FLT3	84
FLT3-autoinhibited	93
FLT4	100
FRK	97
FYN	94
GAK	100
GCN2(Kin.Dom.2, S808G)	100
GRK1	100
GRK2	100
GRK3	93
GRK4	84
GRK7	100
GSK3A	59
GSK3B	80
HASPIN	74
HCK	92
HIPK1	100
HIPK2	95
HIPK3	85
HIPK4	89
HPK1	100
HUNK	54
ICK	91
IGF1R	89
IKK-alpha	100
IKK-beta	100
IKK-epsilon	86
INSR	91
INSRR	82
IRAK3	96
IRAK4	100
ITK	72
JAK1(JH1domain-catalytic)	84
JAK1(JH2domain-pseudokinase)	93
JAK2(JH1domain-catalytic)	100
JAK3(JH1domain-catalytic)	97
JNK1	94
JNK2	100
JNK3	100
KIT	78
KIT-autoinhibited	84
LATS1	90
LATS2	99
LCK	87
LIMK1	77
LIMK2	80
LKB1	72
LOK	86
LRRK2	100
LTK	87
LYN	79
LZK	65
MAK	81
MAP3K1	100
MAP3K15	97
MAP3K2	100
MAP3K3	92
MAP3K4	95
MAP4K2	71
MAP4K3	77
MAP4K4	69
MAP4K5	76
MAPKAPK2	73
MAPKAPK5	90
MARK1	67
MARK2	93
MARK3	92
MARK4	79
MAST1	100
MEK1	80
MEK2	89
MEK3	98
MEK4	100
MEK5	100
MEK6	75
MELK	84
MERTK	73
MET	89
MINK	71
MKK7	84
MKNK1	85
MKNK2	100
MLCK	79
MLK1	84
MLK2	68
MLK3	83
MRCKA	91
MRCKB	89
MST1	93
MST1R	100
MST2	74
MST3	74
MST4	67
MTOR	58
MUSK	81
MYLK	85
MYLK2	80
MYLK4	96
MYO3A	94
MYO3B	62
NDR1	68
NDR2	73
NEK1	84
NEK10	100
NEK11	100
NEK2	86
NEK3	89
NEK4	40
NEK5	85
NEK6	83
NEK7	87
NEK9	88
NIK	89
NIM1	100
NLK	74
OSR1	100
p38-alpha	97
p38-beta	78
p38-delta	90
p38-gamma	87
PAK1	100
PAK2	64
PAK3	100
PAK4	100
PAK6	81
PAK7	77
PCTK1	100
PCTK2	91
PCTK3	74
PDGFRA	77
PDGFRB	76
PDPK1	78
PFTAIRE2	82
PFTK1	94
PHKG1	89
PHKG2	84
PIK3C2B	90
PIK3C2G	89
PIK3CA	77
PIK3CB	96
PIK3CD	60
PIK3CG	92
PIK4CB	78
PIKFYVE	86
PIM1	88
PIM2	93
PIM3	100
PIP5K1A	49
PIP5K1C	100
PIP5K2B	95
PIP5K2C	99
PKAC-alpha	73
PKAC-beta	50
PKMYT1	77
PKN1	66
PKN2	67
PLK1	80
PLK2	81
PLK3	86
PLK4	84
PRKCD	100
PRKCE	100
PRKCH	75
PRKCI	70
PRKCQ	91
PRKD1	97
PRKD2	100
PRKD3	75
PRKG1	81
PRKG2	65
PRKR	96
PRKX	86
PRP4	68
PYK2	84
QSK	100
RAF1	65
RET	58
RIOK1	60
RIOK2	98
RIOK3	66
RIPK1	84
RIPK2	87
RIPK4	91
RIPK5	91
ROCK1	81
ROCK2	77
ROS1	66
RPS6KA4(Kin.Dom.1-N-terminal)	76
RPS6KA4(Kin.Dom.2-C-terminal)	89
RPS6KA5(Kin.Dom.1-N-terminal)	77
RPS6KA5(Kin.Dom.2-C-terminal)	76
RSK1(Kin.Dom.1-N-terminal)	74
RSK1(Kin.Dom.2-C-terminal)	71
RSK2(Kin.Dom.1-N-terminal)	100
RSK2(Kin.Dom.2-C-terminal)	87
RSK3(Kin.Dom.1-N-terminal)	91
RSK3(Kin.Dom.2-C-terminal)	59
RSK4(Kin.Dom.1-N-terminal)	100
RSK4(Kin.Dom.2-C-terminal)	67
S6K1	65
SBK1	100
SGK	100
SgK110	89
SGK2	100
SGK3	94
SIK	54
SIK2	100
SLK	90
SNARK	97
SNRK	89
SRC	99
SRMS	86
SRPK1	100
SRPK2	99
SRPK3	86
STK16	100
STK33	66
STK35	83
STK36	100
STK39	100
SYK	72
TAK1	100
TAOK1	75
TAOK2	78
TAOK3	83
TBK1	88
TEC	84
TESK1	77
TGFBR1	68
TGFBR2	87
TIE1	97
TIE2	79
TLK1	63
TLK2	91
TNIK	90
TNK1	79
TNK2	76
TNNI3K	100
TRKA	100
TRKB	100
TRKC	100
TRPM6	72
TSSK1B	100
TSSK3	95
TTK	88
TXK	79
TYK2(JH1domain-catalytic)	89
TYK2(JH2domain-pseudokinase)	100
TYRO3	66
ULK1	100
ULK2	100
ULK3	100
VEGFR2	75
VPS34	87
VRK2	75
WEE1	75
WEE2	91
WNK1	93
WNK2	100
WNK3	96
WNK4	100
YANK1	100
YANK2	90
YANK3	77
YES	74
YSK1	90
YSK4	100
ZAK	69
ZAP70	100

## Sheet: Supplementary Table 2
Supplementary Table 2. Chemoproteomic study results based on probe 6 and DMSO
Protein	Fold change (Probe 6/DMSO)	pvalue
SNCA	32	0.00996884
DNAJA1	32	0.021781
HSP90AA4P	32	0.010948
DNAJC7	32	0.10679
HSPB1	32	0.0185476
FLNB	32	0.023838
PGRMC1	32	0.01661
C16orf58	32	0.00828
EPHX1	32	0.023195
AKR7A2	32	0.081686
POR	32	0.079241
SPTLC1	32	0.041969
HSD17B10	32	0.036438
AGL	32	0.036703
RAB14	32	0.001557
CKAP4	32	0.018097
COPB1	32	0.049313
BSG	32	0.03284
APEH	32	0.019708
SNRPA1	32	0.01124
PRAF2	32	0.025691
XPOT	32	0.065002
XPO1	32	0.0428
VDAC3	32	0.046137
TMX1	32	0.011885
CD81	32	0.045713
ECH1	32	0.019873
SSR4	32	0.054645
DRG1	32	0.076622
AGK	32	0.022053
SLC38A1	32	0.031376
STX12	32	0.147191
NAMPT	32	0.03897
ISOC1	32	0.148319
LBR	32	0.022188
TTC38	32	0.014418
SCARB1	32	0.040183
APMAP	32	0.004338
ALDH3A2	32	0.024882
SLC25A13	32	0.060724
VAT1	32	0.04891
CTBP2	32	0.0726
NCBP1	32	0.001266
C14orf166	32	0.0403611
BLMH	32	0.217753
GNB1	32	0.109208
PPP2CA	32	0.0821672
SCARB2	32	0.0220224
VDAC1	32	0.0291431
NCAPH	32	0.0194154
TEX264	32	0.00101421
UNC45A	32	0.027885
CTH	32	0.00114411
NIT1	32	0.0171456
SNX5	32	0.00566087
RPL9	32	0.0448099
TBL2	32	0.0225942
GPX8	32	0.052555
TPM3	32	0.0107661
COPG2	32	0.0562841
TOMM40	32	0.0943017
ACTN1	32	0.0405596
SF3A3	32	0.0130969
LUC7L2	32	0.00517294
DDX39B	32	0.0462613
GRWD1	32	0.0407337
SCCPDH	32	0.0127887
BAX	32	0.0886129
ATP2A2	32	0.0199111
ERP44	32	0.042679
PDLIM1	32	0.0593946
HNRNPH2	32	0.057975
SEC24C	32	0.0270401
VDAC2	32	0.0130334
ALDH2	32	0.044087
DARS2	32	0.386828
TXNDC17	32	0.0379022
NAA15	32	0.011006
IPO7	32	0.0323205
QARS	32	0.0119899
DYNLRB1	32	0.159175
ATAD3A	32	0.015
EIF2AK2	32	0.107953
NUP155	32	0.020984
SERPINH1	32	0.089981
SHMT1	32	0.014605
SFXN1	32	0.01464
HADHA	32	0.015378
EIF3M	32	0.06054
SIGMAR1	32	0.033337
PDIA6	32	0.059799
NDUFB8	32	0.022947
ETFB	32	0.038997
RBM39	32	0.106388
EIF3C	32	0.004722
FAM98B	32	0.001957
IPO5	32	0.039858
DDX5	32	0.04557
RANBP2	32	0.011387
TTLL12	32	0.047953
PTPN1	32	0.042704
AP1M1	32	0.00715
SAMM50	32	0.054008
ANXA6	32	0.098986
VBP1	32	0.005418
PSMC3	32	0.031715
NNT	32	0.002548
SARS	32	0.065318
LTA4H	32	0.018092
MCM5	32	0.027522
PCK2	32	0.115879
PRDX3	32	0.079281
MT-CO2	32	0.033531
PSMB2	32	0.08211
MSH2	32	0.010653
CSTB	32	0.068825
VPS26A	32	0.130938
RDH11	32	0.004791
SUCLG1	32	0.039839
ARL3	32	0.012009
PGRMC2	32	0.038244
GRHPR	32	0.024652
EZR	32	0.049855
UBE2O	32	0.127063
IPO4	32	0.068343
RAB1B	32	0.097701
RNH1	32	0.018778
CHCHD3	32	0.087315
SDHB	32	0.036124
UBTF	32	0.001306
HLA-C	32	0.01854
EIF3A	32	0.039358
PFKL	32	0.047252
ZNF326	32	0.013412
PPP1CA	32	0.024502
VPS35	32	0.018236
TUBA1B	32	0.05247
HARS	32	0.001329
HINT1	32	0.026192
BLVRB	32	0.041251
SPTAN1	32	0.101573
THOP1	32	0.078924
ALDH7A1	32	0.014116
RPL30	32	0.05789
HNRNPUL2	32	0.040235
CANX	32	0.034757
IARS	32	0.021661
TIMM50	32	0.176411
AGPS	32	0.026033
XPNPEP1	32	0.113994
SGPL1	32	0.083806
RPS17	32	0.027437
ALDOC	32	0.010329
HNRNPH1	32	0.093822
EIF2S2	32	0.007671
CAPN1	32	0.032557
FAM98A	32	0.006346
PSMD1	32	0.106282
OLA1	32	0.139824
DHX30	32	0.044037
ATP1A1	32	0.005669
ETFA	32	0.093859
NT5DC1	32	0.063257
ADH5	32	0.013
SLC25A1	32	0.109811
PSMA5	32	0.091916
MTA2	32	0.027382
PGAM1	32	0.010363
LRRC59	32	0.064543
PRPF6	32	0.011971
MT-ATP6	32	0.067797
SUGT1	32	0.181606
WDR61	32	0.038651
PEF1	32	0.012767
PUF60	32	0.010598
MTHFD1L	32	0.045052
TOMM70	32	0.017951
SPCS3	32	0.046285
DSTN	32	0.145551
GLOD4	32	0.061779
RPS5	32	0.128408
ECHS1	32	0.010225
GSTK1	32	0.042556
MPP6	32	0.081436
MAT2A	32	0.02028
STIP1	32	0.02454
ARPC4	32	0.04853
PPP5C	32	0.047878
PYGL	32	0.065388
PRPF8	32	0.119044
PGLS	32	0.028098
HDGF	32	0.045558
GEMIN5	32	0.025086
RPL10	32	0.04504
DDX39A	32	0.006131
MT-ND3	32	1.23e-05
SAR1A	32	0.001952
MAT2B	32	0.00115
C20orf27	32	0.08345
HCCS	32	0.100571
SNRPD1	32	0.006371
PLIN3	32	0.017183
WDR5	32	0.079214
NLN	32	0.109912
GOT2	32	0.02915
PHGDH	32	0.012584
SACM1L	32	0.020303
RPL10A	32	0.039349
TRIM28	32	0.023489
SLC3A2	32	0.00927
RNPEP	32	0.117757
RDX	32	0.062667
USP5	32	0.008119
DTYMK	32	0.022507
NANS	32	0.020242
IRS4	32	0.022431
RAB5C	32	0.121368
RPS4X	32	0.069856
NSF	32	0.046511
LYPLA1	32	0.058931
CEP295	32	0.033338
PTPA	32	0.01781
CPNE3	32	0.000387
CCT2	32	0.022129
PARK7	32	0.031875
SSRP1	32	0.087447
ADD1	32	0.040191
SRP68	32	0.059063
CDC5L	32	0.017647
NOP58	32	0.025002
RAP1B	32	0.01546
ILF2	32	0.130235
EIF3D	32	0.020518
FUBP1	32	0.005237
PPA1	32	0.027956
IKBKAP	32	0.004271
NDUFS1	31.9426	0.115465
ABCD3	31.8796	2.44e-05
DKC1	31.8621	9.35e-05
SNX2	31.4614	0.025452
HAT1	31.3792	0.001127
UBE2K	31.3223	0.065237
AHSA1	31.1893	0.041
ARCN1	31.1024	0.042565
ACTR1A	31.072	0.074702
FKBP2	31.0403	0.011142
RPS16	31.0255	0.031563
GMFB	30.9922	0.071468
HK1	30.7834	0.013639
ACOT7	30.5376	0.044609
PHF6	30.5336	0.008208
SEC13	30.4851	0.093012
HIST2H2BE	30.3688	0.00065
CS	30.2471	0.091528
COX5B	30.2444	0.001779
G6PD	30.2024	0.001137
AASDHPPT	30.1246	0.10337
PNP	30.0421	0.164216
ACTB	29.9772	0.032813
G3BP1	29.9035	0.09435
FHL1	29.7352	0.010302
MAGOH	29.7249	0.084519
IDH1	29.6854	0.027987
SNRNP40	29.6441	0.01699
DDX46	29.5317	0.127795
RPS24	29.3206	0.147237
POGZ	29.2484	0.081387
GNAI2	29.2188	0.072964
NUP210	29.1479	0.093802
PPIA	29.1294	0.071687
PABPC1	29.0678	0.027221
RAB6A	29.0568	0.01995
NPEPPS	29.0457	0.045392
GSTO1	28.9053	0.065824
RPL23	28.8812	0.105114
MIF	28.8715	0.0306
MCM3	28.7828	0.052778
MLEC	28.6937	0.053336
MCM4	28.6128	0.102305
FEN1	28.4225	0.123395
PYCR1	28.2728	0.03886
HSPG2	28.1281	0.001055
UBE2N	28.0639	0.151331
EIF3L	28.0112	0.041973
HSPA4L	27.9556	0.023356
DCTN2	27.7774	0.047801
ANKLE2	27.6576	0.019305
PSMA4	27.6472	0.029909
C1QBP	27.1994	0.194558
XRCC6	27.1071	0.023433
CKMT1A	27.0804	0.025885
PEPD	26.8002	0.124084
TOP2A	26.6254	0.025425
WDR12	26.4201	0.070366
RCC2	26.3986	0.013129
AKR1A1	26.2871	0.02788
NUP43	26.2594	0.089648
IGF2BP3	26.1214	0.064742
SOD1	25.9032	3.56e-05
STX7	25.8903	0.046392
CLUH	25.817	0.045965
SART3	25.6295	0.072836
ACTR3	25.6293	0.010047
SEPT11	25.5431	0.000775
DRG2	25.5067	0.17506
TMPO	25.4985	0.003936
VCP	25.4642	0.022031
TNPO1	25.2395	0.020103
PSMA1	25.0524	0.015343
CPSF6	25.0248
RAB11A	24.8719	0.02643
RAE1	24.8524	0.166812
RPS12	24.8154	0.023439
UCHL3	24.7582	0.009021
DDB1	24.6662	0.034091
SLC1A5	24.2681	0.051459
PRMT5	24.2554	0.047438
RANBP3	24.0119	0.134457
GNAI3	23.979	0.019553
MYL6	23.8327	0.013797
PSMD4	23.7523	0.090664
RABGGTB	23.7006	0.069789
NAP1L4	23.6788	0.035992
EXOSC3	23.6678	0.004179
NIT2	23.5701	0.007853
MAD2L1	23.5568	0.000559
ILF3	23.534	0.002624
MCCC2	23.358	0.061956
SKIV2L2	23.3519	0.032882
SNRPN	23.2414	0.000314
HMGB1	23.2411	0.004315
ACTR2	23.1793	0.002223
SF3A1	22.9498	0.056933
PSAT1	22.888	0.039633
PSMC6	22.8266	0.192588
PDIA4	22.702	0.010317
PSMA7	22.5736	0.015123
RPS20	22.2942	0.010377
CARM1	22.2673	0.07382
GDI1	22.2115	0.025667
LANCL1	22.1745	0.038926
TOR1AIP1	21.9649	0.005355
PSMD7	21.8916	0.10334
GSTP1	21.7213	0.062456
CSE1L	21.5576	0.050821
ACTN4	21.4788	0.018525
ATXN10	21.4143	0.012576
RANGAP1	21.3475	0.073293
DARS	21.3319	0.008311
SRM	21.2522	0.03448
ACOT13	21.1625	0.010461
LARS	21.0759	0.032672
ATP5F1	20.9824	3.97e-05
PITPNB	20.9235	0.029623
UBE2D2	20.8935	0.006286
NUDT5	20.7949	0.015875
TRA2A	20.6461	0.001065
CFL1	20.6318	0.002904
BOLA2	20.63	0.058699
MGEA5	20.6097	0.008885
PMPCB	20.6041	0.006403
PRKDC	20.5302	0.045859
CAPZB	20.4834	0.020625
TIGAR	20.3939	0.015876
COPA	20.35	0.02586
MSH6	20.2441	0.00089
ADSS	20.2419	0.077479
PPIL1	20.2054	0.007545
PKM	20.2044	0.071236
ARHGDIA	20.1041	0.186291
USMG5	19.8995	0.027006
DDX1	19.8885	0.02281
UCHL1	19.8844	0.028317
SEC23A	19.8673	0.046665
MYBBP1A	19.8644	0.093702
GOSR1	19.8489	0.021142
CHORDC1	19.8411	0.028289
SEC63	19.8093	0.013104
SEC22B	19.8057	0.002659
VTA1	19.6889	0.161241
PGK1	19.6844	0.027107
KHSRP	19.6131	0.021613
NMT1	19.5567	0.042637
TUBB2B	19.4781	0.094989
OAT	19.374	0.093509
HNRNPF	19.3513	0.054881
VAPA	19.3129	0.012408
EIF5	19.2958	0.099702
PAPSS1	19.2769	0.075832
USP39	19.2595	0.080113
SRPRB	19.2159	0.000919
BDH2	19.1517	0.002317
PRPF19	19.099	0.065813
TMEM43	19.026	0.040522
KPNA2	18.9778	0.041901
RPS3A	18.9359	0.044617
SF3B1	18.7724	0.046521
CCT6A	18.7356	0.087015
DHX9	18.6763	0.06222
CAP1	18.6047	0.061928
CNBP	18.6006	0.041512
GLRX3	18.5599	0.009807
ABCF1	18.4643	0.042197
HADHB	18.4436	0.200577
NSUN2	18.0515	0.017626
PFAS	17.9807	0.017833
EIF4A1	17.9219	0.013861
LETM1	17.9147	0.000794
ESD	17.8655	0.020733
HNRNPUL1	17.8438	0.039044
PDCD6IP	17.8109	0.06051
ALDH9A1	17.7806	0.04954
EEF1G	17.7335	0.039087
GLA	17.6263	0.081897
RPL7A	17.614	0.008464
ANP32B	17.5643	0.173805
NOP56	17.5377	0.015857
CKB	17.5227	0.049564
HM13	17.5093	0.01122
MCM2	17.458	0.00268
RANBP1	17.3867	0.011359
TLN1	17.3363	0.028474
SNRPG	17.3326	0.093839
GMPS	17.291	0.054363
KHDRBS1	17.2252	0.000918
KARS	17.2173	0.011755
CCT3	17.1938	0.047496
RPL27	17.1222	0.000147
CCT4	17.1102	1.22e-05
RPA2	17.0352	0.026104
CYB5R3	16.9685	0.058275
RTCB	16.9636	0.000475
TKT	16.9479	0.033548
UBE2M	16.8881	0.00075
IMMT	16.811	0.139172
CNN3	16.783	0.0254
PCNA	16.7211	0.017898
CALR	16.63	0.025142
ATP5H	16.5084	0.044188
DNMT1	16.4827	0.06833
PCBP1	16.4422	0.029411
FXR1	16.3941	0.022731
API5	16.3367	0.079512
TMED10	16.3275	0.042162
TFG	16.3153	0.040097
PPP2R1A	16.2963	0.008262
RPL35A	16.2134	0.046264
AARS	16.209	0.072305
FLNA	16.198	0.006626
FASN	16.195	0.049848
NAE1	16.1182	0.035516
AP1B1	16.0324	0.015667
EIF3B	15.9922	0.043015
GLUD1	15.9724	0.00697
KPNB1	15.9206	0.009073
PAFAH1B1	15.9103	0.028724
PSMD3	15.9025	0.091757
HNRNPA0	15.8768	0.095946
ATP5B	15.8197	0.053992
GARS	15.8049	0.087207
HNRNPDL	15.7868	0.010716
RHOA	15.7162	0.016038
SMC2	15.5958	0.171487
HNRNPC	15.5753	0.025323
SRI	15.5744	0.083766
SCAMP3	15.5632	0.047626
GSR	15.539	0.016743
DDX17	15.5342	0.01544
UCHL5	15.4699	0.012758
PDIA3	15.4272	0.006367
CBR1	15.4166	0.087277
P4HB	15.3938	0.017531
TUBB4A	15.25	0.047196
EIF4G1	15.2495	0.009547
HNRNPM	15.2218	0.036284
TAGLN2	15.2025	0.009609
CAD	15.1926	0.020722
RPN2	15.0378	0.038993
WDR77	15.0065	0.009202
ACP1	14.6994	0.001084
PSMB4	14.6098	0.036979
TUBB	14.57	0.014177
ZC3HAV1	14.5667	0.016048
MCM6	14.5514	0.006784
ARPC1A	14.4639	0.04301
EFTUD2	14.4601	0.037783
PFN1	14.4569	0.015999
FBL	14.4558	0.024626
VARS	14.452	0.044474
PLS3	14.4241	0.031497
HSPD1	14.3354	0.000182
EEF1B2	14.3321	0.052956
BPNT1	14.3101	0.021183
ANP32E	14.3037	0.029793
TES	14.2866	0.270889
PHF5A	14.1672	0.035272
UPF1	14.1236	0.139689
MRPL48	14.1044	0.005031
DDX19A	14.0854	0.009896
UBA2	14.0846	0.007532
MARS	13.951	0.016759
RPL7	13.9041	0.017289
SRRT	13.8954	0.066557
ENO1	13.8615	0.026645
DDX21	13.8469	0.047495
SYNCRIP	13.8444	0.060221
PSMD13	13.8184	0.059512
GDI2	13.7888	0.021938
RARS	13.7499	0.062285
HPRT1	13.7209	0.002353
MDH2	13.6977	0.01019
NONO	13.6796	0.041568
HMGB2	13.6645	0.016212
PTPN11	13.6569	0.010469
CAND1	13.6215	0.014894
IMPDH2	13.6177	0.002997
DENR	13.5369	0.05585
GFPT1	13.527	0.033084
MYH10	13.4676	0.026524
RPL3	13.4374	0.011871
ACTL6A	13.4286	0.111139
TUFM	13.4096	0.056095
RPS28	13.3684	0.059461
EIF5A	13.3127	0.022547
ARF1	13.2381	0.006451
TRAP1	13.1933	0.014544
RAB7A	13.1571	0.009593
AHCY	13.1552	0.001077
RBBP4	13.1456	0.003016
CDK1	13.1373	0.017875
PARP1	13.034	0.032436
CTPS1	13.016	0.024625
VCL	12.8933	0.073147
FAF2	12.8897	0.008157
HCFC1	12.8818	0.09339
GART	12.8379	0.004626
MRPS22	12.8336	0.099203
DYNC1H1	12.7508	0.048612
SF3B3	12.7407	0.059129
PEBP1	12.7211	0.039698
SLC25A6	12.662	0.035041
TMED2	12.6473	0.02044
HNRNPA3	12.6256	0.026466
RBM22	12.5932	0.010523
PLD3	12.5911	0.05781
SMU1	12.5734	0.002883
NUP93	12.541	0.039678
IDH3A	12.5238	0.017314
RRM1	12.4896	0.040783
EEF2	12.4684	0.002557
MTPN	12.466	0.061178
CCT5	12.4567	0.03202
PRMT1	12.4118	0.031104
DEK	12.3445	0.062175
TUBB4B	12.3333	0.015286
UBA1	12.3311	0.043831
PDHA1	12.2713	0.022655
NHLRC2	12.2156	0.032601
RACK1	12.1735	0.024997
RPL17	12.0785	0.000865
SLC7A5	12.0685	0.013237
CORO1C	12.0588	0.088625
IQGAP1	12.0524	0.033567
EIF4H	12.051	0.003502
PTGES3	12.0479	0.035046
PCBP2	12.036	0.04052
RPSA	12.0084	0.049837
HNRNPH3	11.9616	0.004472
LAP3	11.9485	0.004161
HSPA9	11.9476	0.026366
NME2	11.8533	0.011277
SEC61B	11.79	0.015669
ATP5A1	11.7513	0.003145
PRDX1	11.7244	0.046349
RBBP7	11.7096	0.006816
ASNS	11.6561	0.033777
PAICS	11.6417	0.010769
RPL32	11.536	0.013868
DNM2	11.5228	0.050316
CYFIP1	11.5129	0.010211
PSMD12	11.507	0.010485
SNRNP200	11.5055	0.090956
MSN	11.4933	0.007649
GTF2I	11.491	0.060607
U2SURP	11.4866	0.009832
NUTF2	11.4862	0.092231
CKAP5	11.4833	0.060207
PRDX4	11.4824	0.014676
FARSB	11.4807	0.001142
SHMT2	11.448	0.014027
ERLIN1	11.4286	0.026056
PPIB	11.4091	0.028203
EEF1D	11.3675	0.017465
WARS	11.3568	0.03481
ARPC2	11.3448	0.000483
SRSF9	11.3335	0.020407
RPS3	11.3299	0.030644
FAF1	11.2449	0.000634
ATIC	11.2034	0.07175
SRSF3	11.1366	0.05853
DDX3X	11.1274	0.062028
APEX1	11.1052	0.003255
NUDC	11.0924	0.107478
EIF3I	11.0607	0.009854
STRAP	11.0201	0.014265
MYH9	10.9976	0.027402
TARS	10.9721	0.016921
RUVBL1	10.9662	0.073433
ANP32A	10.9554	0.094025
CLIC1	10.9429	0.046682
FSCN1	10.9425	0.03726
TBC1D15	10.9125	0.01741
RPL24	10.8947	0.00043
CLTC	10.8609	0.010069
GORASP2	10.8254	0.005326
HUWE1	10.8184	0.008034
HNRNPK	10.7973	0.001533
PDHB	10.7387	0.035916
GLO1	10.7154	0.015651
COPB2	10.6541	0.007407
ARL8B	10.6084	0.038676
CCT8	10.5915	0.010081
NME1	10.5509	0.003178
EIF3E	10.5407	0.038333
CBS	10.5297	0.000716
CCT7	10.5287	0.024526
GSPT2	10.4777	0.052992
NASP	10.4575	0.010097
EMD	10.4428	2.75e-05
ACLY	10.4341	0.000502
ALDH18A1	10.3843	0.028403
VPS29	10.3764	0.159576
HSPA4	10.3639	0.009472
PCCB	10.3566	0.15574
FKBP4	10.2964	0.001688
KIF5B	10.2898	0.051962
GANAB	10.2739	0.052414
SUMO1	10.2506	0.052327
OSBP	10.2385	0.016471
TP53	10.211	0.047525
TCEA1	10.1973	0.118791
ST13	10.1828	0.016241
FKBP3	10.1712	0.056881
NACA	10.1275	0.014812
PGM1	10.112	0.024934
RCC1	10.0784	0.000961
SFPQ	10.0676	0.040748
CUL4B	10.0663	0.047958
PRDX6	10.0499	0.06491
ATP6V1A	9.9891	0.0488384
ACADM	9.96415	0.0928266
RPS2	9.9368	0.0248137
PSMD2	9.93211	0.0165641
CSTF3	9.89587	0.00196685
IGF2BP1	9.89366	0.0467357
DLST	9.88361	0.00904743
KCTD12	9.88229	0.0136966
PSMD14	9.84881	0.078742
RAB2A	9.8213	0.0303728
HLA-C	9.82088	0.00281666
LMNB2	9.78199	0.00493964
RBM8A	9.76363	0.00193246
SCAMP4	9.76138	0.00101298
SNRPD3	9.74155	0.0641277
GTPBP4	9.69805	0.00709057
MATR3	9.67899	0.0474107
SUPT16H	9.645	0.0382902
THOC5	9.60768	0.0392936
RPS15A	9.58459	0.0105491
CPSF1	9.57512	0.0174338
CTTN	9.56395	0.0213683
DHX15	9.51109	0.0205116
HSPH1	9.45465	0.0309366
ELAVL1	9.44126	0.0379436
UQCRC1	9.42502	0.0427949
WDR18	9.4175	0.0652123
HSPA5	9.34931	0.022932
RPS11	9.31663	0.0197199
RPS6	9.29142	0.0133097
SRSF7	9.24836	0.0268557
XRCC5	9.24671	0.030178
SLC25A5	9.13934	0.0628409
RPS27A	9.12642	0.0540902
PSMC1	9.09099	0.0558533
HNRNPR	9.08657	0.0359466
MYDGF	9.02379	0.033337
HIST1H2AJ	9.02136	0.0627109
POLR2H	9.00176	0.219028
SMARCA5	8.97885	0.0422
DIS3	8.93608	0.0171589
PSMB1	8.91016	0.00748685
RPL35	8.90007	0.013814
CACYBP	8.88979	0.00800907
SFXN3	8.86743	0.0019921
SND1	8.86289	0.0125602
ANXA11	8.85775	0.0330612
RPS9	8.84438	0.00839837
YARS	8.84172	0.00248873
SEC31A	8.78782	0.187114
DBNL	8.7652	0.00039639
EIF2S3	8.72032	0.00029135
PRKCSH	8.6874	0.00072453
RPL22	8.68494	0.0231501
HNRNPA1	8.66024	0.0145503
SMC3	8.64272	0.00148309
ADSL	8.59012	0.00391845
EIF6	8.56337	0.0594343
TCP1	8.54986	0.00319203
RPL36	8.54531	0.0271789
HNRNPD	8.54335	0.00031167
HSP90AA1	8.47301	0.00038812
DDX18	8.46279	0.0708727
ZC3HAV1L	8.44844	0.00365178
SDHA	8.42894	0.0203289
RPL27A	8.41998	0.00150815
LSM8	8.40512	0.00478963
WDR1	8.32677	0.017504
GOT1	8.30887	0.1565
YWHAE	8.29716	0.0068136
FUS	8.2907	0.019229
RPS8	8.28866	0.0133815
RPL4	8.24922	0.0261238
ERH	8.20822	9.2667e-05
RPL5	8.20609	0.00755375
RUVBL2	8.20484	0.0642927
LDHB	8.19851	0.0101068
H2AFY	8.14164	0.044455
RBM25	8.12012	0.00184357
AKR1B1	8.08792	0.00736948
PGAM5	8.05643	0.0415301
RPL18	8.04122	0.0301141
RPLP0	8.02849	0.0921838
RPL38	8.02729	0.0434747
HNRNPL	8.02446	0.0162423
MTHFD1	7.97852	0.00244867
GLUL	7.90479	0.0138827
PABPC4	7.85046	0.0515907
HACD3	7.80091	0.0112611
HNRNPU	7.75201	0.0230443
GAPDH	7.71745	0.0213098
EBNA1BP2	7.70759	0.154246
CDKN2A	7.68457	0.0858871
RPA1	7.68202	0.00997217
TXNDC5	7.66999	0.00644744
ABCE1	7.57721	0.0231523
PGD	7.56718	0.010836
HSPA8	7.56704	0.0098032
CA2	7.54598	0.0268381
SRP14	7.54322	0.0121835
PHB	7.49416	0.0569104
PSMA6	7.47052	0.0266248
NUMA1	7.454	0.0122285
NUP153	7.45244	0.00819177
TLE3	7.44419	0.0472846
PRPS1	7.42746	0.00079768
HSPA1B	7.42449	0.0240094
SARNP	7.37526	0.0182612
SRRM2	7.34651	0.101733
RAN	7.23921	0.0497155
EPRS	7.23793	0.0158532
ENAH	7.21067	0.129677
FABP5	7.19356	0.0562378
RPS7	7.16869	0.00065413
OTUB1	7.14671	0.0233013
AP1G1	7.13342	0.180317
LRPPRC	7.12527	0.00311464
LARP1	7.10504	0.0112771
EIF2S1	7.1025	0.0245742
SERBP1	7.075	0.00175571
ACTG1	7.0276	0.0177023
HDAC1	7.01579	0.0315336
PSMD10	7.01366	0.109153
EIF3K	6.99309	0.00163875
DUT	6.96219	0.13388
MDH1	6.92848	0.0731445
TALDO1	6.92531	0.0266617
HSP90B1	6.89303	0.0657702
ALDOA	6.88089	0.0340362
LMAN2	6.88029	0.00090866
CAPZA1	6.87773	0.0444781
PTBP1	6.8343	0.114548
FKBP1A	6.80921	0.0304337
IARS2	6.78299	0.0919851
HBS1L	6.7817	0.0220651
SF1	6.78086	0.196242
ATP5O	6.71272	0.0013642
PRDX2	6.71078	0.0121448
RALY	6.69281	0.0243271
HIBADH	6.69272	0.0188354
UBE2E1	6.64516	0.00364892
RPL6	6.63841	0.00305934
U2AF1	6.63755	0.0228829
RPL12	6.61344	0.00367553
USP7	6.60913	0.154511
AK2	6.57639	0.0207176
UFD1	6.56127	0.00663474
RPL11	6.55434	0.00219803
HIST1H4A	6.54972	0.0328258
DCTPP1	6.54688	0.0258394
ETF1	6.53615	0.00675155
SSB	6.52541	0.00091579
SEPT7	6.48614	0.00202864
RPS23	6.47368	0.0149601
LUC7L3	6.45851	0.0563126
RPL15	6.43239	0.139501
RBM14	6.3994	0.0602959
RAD50	6.37844	0.162703
EIF4A3	6.35546	0.0294377
SLC25A3	6.35358	0.00608999
CDC37	6.32886	0.0834108
DBN1	6.31433	0.0388665
ACO2	6.30379	0.0340632
RAD23B	6.28885	0.00903977
LDHA	6.28406	0.00104895
NPM1	6.28135	0.0255317
ATP6V0D1	6.25582	0.0418879
TARDBP	6.24743	0.00535435
FLOT1	6.20464	0.0191738
PRDX5	6.18963	0.172866
HSP90AB1	6.1779	0.00169993
CCAR2	6.08623	0.112376
ACAT1	6.08384	0.015802
APRT	6.06714	0.00397066
PPM1G	6.04945	0.0190152
EEF1A1P5	6.00827	0.0234441
BROX	5.97907	0.0242302
UQCRC2	5.97823	0.00045804
PSPC1	5.96731	0.0383269
ERP29	5.95966	0.0108254
STOML2	5.93087	0.0933718
SNU13	5.90907	0.00082866
TOP1	5.90798	0.0202508
NKRF	5.89958	0.043435
HIST2H3A	5.86107	0.00397404
SLC25A11	5.85943	0.0582551
LAMP2	5.82989	0.307184
PSMC2	5.78161	0.02311
FARSA	5.76557	0.0407203
MRI1	5.75925	0.0160627
MAP4	5.75855	0.0233183
CBX3	5.75388	0.0049251
CTSD	5.7535	0.022472
SUMO2	5.74197	0.00173311
NUP205	5.74174	0.09139
PSMB5	5.7343	0.00532769
SBDS	5.73389	0.041045
RPL13A	5.72658	0.00256139
TCERG1	5.72544	0.095216
DDOST	5.70304	0.0171805
PPP1CC	5.66327	0.021468
HADH	5.6434	0.00253465
PA2G4	5.62941	0.0072392
MRTO4	5.60812	0.0465415
ZC3H11A	5.60791	0.065936
RPS27	5.59262	0.0378172
BUB3	5.58565	0.0202861
RPL37A	5.54788	0.00177642
GSS	5.52972	0.0181966
HNRNPA2B1	5.51801	0.00222457
TBCB	5.50912	0.0341359
RAC1	5.45797	0.0278961
CFAP20	5.38657	0.0183181
RPN1	5.37345	0.0112195
STT3B	5.34741	0.0638918
EIF4B	5.30822	0.0379056
EWSR1	5.23836	0.0211575
MAP2K2	5.21966	0.0901411
PSMA3	5.21479	0.0919369
SEC61A1	5.14436	0.0168867
PRPSAP2	5.13714	0.195957
DYNC1I2	5.12839	0.0444214
RPS25	5.12679	0.0328435
HINT2	5.0827	0.00359548
TPI1	5.06863	0.0606891
ATP6V1H	5.0528	0.0391867
RPL18A	5.03389	0.00455901
SERPINB12	5.03053	0.0742388
CPSF7	5.02257	0.027818
RAD23A	5.005	0.0754033
YWHAQ	4.95888	0.0455058
COPS5	4.9293	0.060791
BLVRA	4.89193	0.00441513
DCTN1	4.87186	0.0294141
PCBD1	4.83739	0.11282
HMGB3	4.79803	0.006064
PCNP	4.76386	0.0483003
NAT10	4.71597	0.040026
JPT2	4.68723	0.0473594
PFN2	4.66941	0.00570052
ADRM1	4.63043	0.057691
MCM7	4.60929	0.0424568
TIAL1	4.60893	0.0119901
YTHDF2	4.57573	0.0767547
SRP72	4.56578	0.0852955
EIF3H	4.50055	0.00630892
NOP2	4.49272	0.11931
HDLBP	4.45939	0.074425
PPP2R2A	4.45773	0.0162802
LMNB1	4.45177	0.0122546
SUCLA2	4.44299	0.114161
SRSF4	4.41968	0.00183471
GNAS	4.41677	0.00830441
HSD17B4	4.36408	0.00828143
MARCKSL1	4.35028	0.0291176
SMC1A	4.31343	0.0494149
PSMC5	4.2588	0.00794679
TXN	4.25086	0.0522209
RPL13	4.24708	0.00712303
KPNA1	4.20535	0.0838409
AIFM1	4.17847	0.00775172
SRSF1	4.16277	0.00417619
RPL8	4.0977	0.00700787
RPS14	4.09581	0.0109082
NDUFS6	4.06999	0.0724189
RPL19	4.0691	0.0234266
ANXA5	4.06901	0.0288826
BCLAF1	4.06219	0.0771442
VIM	4.04627	0.00806177
BCAP31	4.01264	0.0110455
RPL14	3.98091	0.0200191
CDC42	3.98082	0.0175371
HIST1H2BM	3.94976	0.0273525
SMC4	3.93736	0.0517975
SNRPD2	3.89953	0.00200631
COX5A	3.8869	0.0832871
YWHAB	3.88241	0.0303928
HNRNPAB	3.8755	0.0144724
HSPE1	3.86885	0.141439
GGCT	3.78713	0.0464802
DLD	3.78474	0.0315732
HDGFL2	3.78116	0.117651
ELOC	3.77402	0.113007
YWHAH	3.7572	0.00918918
NCL	3.73615	0.0145057
YWHAZ	3.69323	0.0252688
MYL12A	3.68134	0.135623
GCN1	3.65955	0.157763
RPL26	3.6369	0.00340171
EML4	3.63477	0.180506
ECI1	3.62056	0.112903
SNW1	3.59449	0.0453135
GPS1	3.58394	0.0139528
RPL34	3.57715	0.00710822
UQCRFS1	3.49106	0.0195437
SCRN1	3.48221	0.0230984
TIPRL	3.47614	0.0263453
STT3A	3.47434	0.0261401
YBX1	3.46224	0.0796202
PSMB6	3.4402	0.0109417
SGTA	3.37027	0.0528891
GSTM3	3.36952	0.101635
HSPA6	3.34162	0.011979
PHB2	3.32783	0.0421082
EIF3G	3.29075	0.033367
POLD2	3.27055	0.139206
SNRNP70	3.26617	0.0233829
TRA2B	3.23813	0.0611239
ANXA2	3.23063	0.008164
PIN4	3.22387	0.00361175
USO1	3.16644	0.0085421
GNL3	3.15032	0.0599694
CLTA	3.1334	0.0434546
RPL36AL	3.05859	0.273078
RBMX	3.0347	0.191957
CKAP2	2.98942	0.00817624
SSBP1	2.96339	0.0113058
RAB8A	2.8908	0.015228
MRPL12	2.82309	0.106274
UBE2V2	2.73101	0.0280157
LMNA	2.69875	0.0140841
RPS18	2.67261	0.0719329
PRSS3	2.66646	0.139748
SNRPF	2.58272	0.0210879
RPL28	2.57641	0.0316434
SNX3	2.5739	0.118994
RPS21	2.53839	0.0355476
ARF5	2.52487	0.0954429
SAE1	2.48573	0.28965
CAT	2.23244	0.344638
YWHAG	2.23061	0.0954623
TBCA	2.22654	0.273173
RPL23A	2.22428	0.248438
DSG1	2.18213	0.159359
PHPT1	1.99613	0.0736687
RPL29	1.87792	0.229529
MMTAG2	1.87092	0.111336
HIST1H1C	1.7563	0.310416
MCCC1	1.63003	0.309987
RPLP1	1.5367	0.681557
PC	1.47355	0.32393
TTLL11	1.43146	0.693831
JUP	1.40144	0.688399
HLCS	1.37734	0.653955
HP1BP3	1.20972	0.85614
SFN	1.14668	0.68395
S100A9	0.951111	0.937482
PCCA	0.862359	0.645474
FANCD2	0.826461	0.506556
DCXR	0.786808	0.67487
GAR1	0.78558	0.696191
RPL31	0.763246	0.686646
ATAD3B	0.582954	0.0748634
H2AFV	0.512823	0.549892
DSC1	0.511947	0.485002
SHROOM3	0.435618	0.0540364
DSP	0.332657	0.334429
DCD	0.15455	0.190093

## Sheet: Supplementary Table 3
Supplementary Table 3. Chemoproteomic study results based on probes 6 and 7
Protein	Fold change (Probe 6/Probe 7)	pvalue
DNAJB1	64	0.0209264
AIP	64	0.0305444
SDCBP	64	0.0168405
PPP6C	64	0.010127
MGST3	64	0.0481047
PRPF4	64	0.0270879
NDUFB4	64	0.0280879
CYB5A	64	0.00715623
ASS1	64	0.0255191
SULT1A2	64	0.00196401
SON	64	0.0140699
ATP6V1C1	64	0.00176764
CD9	64	0.0453513
CA8	64	0.0382627
RFC2	64	0.0386593
LSS	64	0.0477798
PPT1	64	0.010058
ATP1B3	64	0.0182228
MAZ	64	0.036714
RAP1A	64	0.00349041
RBX1	64	0.0189725
EXOSC10	64	0.0367708
PFKP	64	0.0257905
CSTF1	64	0.0332986
SF3B2	64	0.039977
TMED1	64	0.037296
MTX1	64	0.0395203
CAMK2A	64	0.0269492
USP10	64	0.00317295
ARL6IP1	64	0.0124443
DPYSL2	64	0.0481212
ALG11	64	0.00177216
PPP6R3	64	0.0266719
SLC27A3	64	0.0183758
TMEM201	64	0.0138442
C9orf64	64	0.00947176
ATPAF1	64	0.0413273
CMC1	64	0.0323125
CENPV	64	0.0406731
TMEM192	64	0.0400137
MMGT1	64	0.00162196
CISD2	64	0.0490205
KRTCAP2	64	0.0363827
EMC1	64	0.00995512
AP3S1	64	0.0218383
MUL1	64	0.00869698
KIF1BP	64	0.0372686
COG3	64	0.0496434
MACROD1	64	0.0448754
ADPGK	64	0.0205193
ACAT2	64	0.00882363
CADM1	64	0.0113939
PFDN2	64	0.0176162
C14orf1	64	0.0144762
PTRH2	64	0.0255669
EMC4	64	0.0395821
FANCD2	64	0.0260723
PRPF40A	64	0.0160755
PRAF2	64	0.0257995
ALDH1A2	64	0.00670699
NT5C3B	64	0.00904331
TMEM214	64	0.0826578
CD63	64	0.00324031
SIGMAR1	64	0.0333626
OCIAD1	64	0.0552627
CYP51A1	64	0.015714
ACTL6A	64	0.101165
MPP6	64	0.0806525
BLMH	60.8878	0.220629
ETFDH	59.8503	0.204834
DNAAF5	54.766	0.0446687
NLN	51.8957	0.108831
EIF5	48.4437	0.0969787
CD81	46.9404	0.0460909
NUP43	42.6593	0.0889167
MT-ND3	42.0417	7.7134e-06
MTCH2	40.4448	0.00427929
PTPN1	40.3415	0.0427241
GPD2	39.1188	0.0473285
HINT3	38.7446	0.0110977
NEK9	38.1871	0.0461621
APOC3	36.9213	0.0116758
NDUFB8	35.896	0.0209181
RTN3	34.6762	0.0265319
TMX1	34.3933	0.0117874
APMAP	33.4275	0.00277795
AKR7A2	32.706	0.0845284
TARS2	28.8927	0.118541
NCBP1	28.6159	0.00088995
DNAJC7	28.1163	0.00966532
IKBKAP	27.3787	0.00349939
GOSR1	26.7894	0.0183215
ACOT7	26.2773	0.0449337
CDC5L	25.6973	0.0197853
MCM4	25.1016	0.103186
ACTN1	24.3356	0.0424823
ARPC4	24.313	0.0486684
SGPL1	24.1127	0.0851635
DYNLL1	23.9502	0.0858949
TNPO1	23.6608	0.0243016
ERP44	23.4029	0.0410778
MT-ATP6	23.2768	0.0680104
NNT	22.9757	0.00043565
SNRPC	22.0074	0.0315118
SLC7A1	21.9639	0.201356
DPM3	21.9496	0.0617631
COX5B	21.9374	0.00156307
TBC1D15	21.6174	0.0155902
RTN1	21.5739	0.0101431
BSG	21.5371	0.0340454
ANP32E	21.3034	0.0320719
STX12	21.2315	0.157425
CAPN1	21.0342	0.033279
CCDC47	20.8091	0.0129172
GMFB	20.6635	0.0715032
RTN4	20.4885	0.0001036
GSTK1	20.0481	0.0402703
ENDOD1	19.9469	0.0265268
SF3A3	19.8542	0.0133364
FAM98A	19.7945	0.00242125
MTA2	19.6632	0.0268851
SLC25A13	19.504	0.0646445
MRE11	19.3645	0.0851989
MTPN	19.1485	0.0594641
NIT2	19.0361	0.00914967
ALDH1B1	18.9521	0.0361395
VDAC1	18.5201	0.031485
IKBIP	18.4045	0.00751213
TRMT112	18.3109	0.0128901
CPT2	18.0891	0.0164999
NIT1	17.6294	0.0183508
DTYMK	17.4889	0.0176193
TIGAR	17.2151	0.0133136
SCARB2	16.7884	0.0195934
ALDH2	16.7166	0.0463906
UBE2O	16.6638	0.134871
GNAI2	16.6018	0.0746199
AGL	16.5163	0.0405703
EXOSC3	16.4299	0.00251566
CKAP4	16.3128	0.0188949
SPG20	16.1351	0.00112773
SLC25A1	16.0537	0.117218
XPO5	16.0147	5.2e-05
HLA-C	15.988	0.0170634
CLCC1	15.883	0.0996659
GEMIN5	15.462	0.0265634
PAPSS1	15.3002	0.073343
SEC62	14.5244	0.0296242
NARS	14.4769	0.0538206
TMEM43	14.4084	0.0453411
CLUH	14.4002	0.0454753
RDX	14.3187	0.0632521
ACSL3	14.2724	0.063412
POLD2	14.2242	0.00447786
SCARB1	14.0742	0.0420282
SEC13	13.5935	0.0997861
AAAS	13.4941	0.119514
TXNDC17	13.4935	0.0361376
HEBP1	13.1408	0.0432782
S100A9	12.9649	0.0697452
MYDGF	12.9301	0.0279794
GNAI3	12.8865	0.0255678
CEP295	12.7632	0.026213
PFKL	12.6483	0.0436532
CIAO1	12.1519	0.00277305
SNX5	12.1368	0.00267328
XPOT	12.05	0.0645456
GSR	12.0446	0.0104907
ALDH3A2	12.0392	0.0291312
TMED10	11.9511	0.0414443
HCCS	11.8935	0.110192
HTATSF1	11.8647	0.077194
SACM1L	11.8429	0.0180759
MCCC2	11.7996	0.0669616
AIMP2	11.7659	0.0534348
RAB2A	11.7512	0.0314501
ATP1A1	11.7197	0.00273388
TPD52L2	11.68	0.00947382
PHF6	11.5913	0.00792071
RDH11	11.478	0.00116091
C20orf27	11.4526	0.0847419
ALDOC	11.408	0.00649706
HMOX2	11.3899	0.0070808
LMAN1	11.3813	0.131951
SERPINB6	11.2655	0.0746626
LPCAT1	11.2203	0.0103882
DHX30	11.1866	0.0483847
VDAC2	11.0112	0.0153047
NDUFA10	10.9944	0.0518882
SCCPDH	10.9787	0.00744874
GPX8	10.9717	0.0592517
ADH5	10.7489	0.0122292
COPS5	10.544	0.0445899
ATP2A2	10.5236	0.0232112
EPHX1	10.4448	0.0278455
HSPA4L	10.4078	0.0261135
OSTC	10.3979	0.103904
FKBP2	10.3838	0.00563539
PIGT	10.365	0.160305
FKBP8	10.3258	0.0664393
HYOU1	10.2773	0.0395346
POR	10.0841	0.0862551
VDAC3	10.0107	0.0508524
TXLNA	9.9581	0.0152255
CPOX	9.9107	0.108673
GCLM	9.9082	0.00872045
BDH2	9.75366	0.0029721
NDUFA4	9.74874	0.0840093
RANBP3	9.72046	0.145385
TRA2A	9.66418	0.0018585
AP1G1	9.62263	0.169769
HNRNPH2	9.53354	0.0633939
KIF2A	9.5103	0.00515198
SPCS3	9.43592	0.0406544
ARFGAP1	9.40087	0.00073947
PPAT	9.38827	0.136892
SAMM50	9.37266	0.050455
NHLRC2	9.28531	0.029771
TRABD	9.22147	0.00428091
CSRP2	9.12301	0.00101513
LTA4H	9.09215	0.00972361
CCDC51	9.06745	0.00668526
NUP155	9.04708	0.0168223
DSG2	9.02324	0.00872466
RABGGTB	8.93248	0.0770054
FAM162A	8.911	0.00286532
TSFM	8.87565	0.00543918
ACP1	8.81133	0.00135515
SCAMP3	8.62159	0.0515244
WDR1	8.56947	0.00694748
NAA10	8.48086	0.0121847
RPL21	8.46693	0.00301076
DNAJC9	8.45246	0.0812705
SLC38A1	8.41412	0.0241562
RAB14	8.25353	0.00513858
SRP68	8.15859	0.0663092
APEH	8.15668	0.00953517
CDKN2A	8.12589	0.0853728
PGRMC2	8.12526	0.0459732
BAG1	8.07875	0.0828495
RBM4	8.05971	0.018023
AGPS	8.05856	0.030116
ATAD3A	7.96547	0.00694725
ACOT13	7.96431	0.00830504
SEC22B	7.94509	0.00125257
MAT2A	7.92496	0.0144869
ATXN10	7.90955	0.00643962
SPTLC1	7.90852	0.0443409
SSR1	7.90602	0.0203432
FLNB	7.85337	0.0280836
VKORC1	7.82812	0.0101924
LAMP2	7.80704	0.289056
PEF1	7.80642	0.00790094
TIMM50	7.79677	0.204327
NSUN2	7.78531	0.0163559
ECH1	7.69478	0.0204732
GTPBP1	7.67021	0.114826
COX17	7.59042	0.005728
ARL3	7.55121	0.00680315
METTL7A	7.54826	0.0249394
REEP5	7.48564	0.0811629
HARS	7.39031	0.00248712
RNH1	7.37165	0.016667
ARIH2	7.35003	0.164232
HNRNPUL2	7.34481	0.0440522
UBTF	7.33658	0.00085932
NAPA	7.33287	0.0132564
VPS26A	7.32712	0.151186
TCERG1	7.32643	0.0827025
HADHB	7.30103	0.226197
GLA	7.26852	0.0898417
SKIV2L2	7.23785	0.0282643
XPNPEP1	7.19383	0.131842
EIF2AK2	7.18257	0.122047
CPSF6	7.15695	0.0937383
CSTB	7.09178	0.0754738
UFD1	7.0757	0.00713251
DUT	7.07457	0.1273
LANCL1	7.05656	0.0480098
EIF3C	7.0508	0.00446632
PITPNB	7.03271	0.032416
SH3GL1	6.96264	0.180843
DENR	6.93603	0.0653881
CHERP	6.92687	0.102873
KPNA6	6.89351	0.0284038
CTBP2	6.8132	0.0754753
TTC38	6.80094	0.0119672
MSH6	6.76013	0.00420205
RALY	6.72373	0.0252141
FHL1	6.66765	0.00382974
SAFB	6.6319	0.00392747
B4GAT1	6.54708	0.0208317
LRRC59	6.51806	0.0666788
PPIB	6.51629	0.0287457
STUB1	6.50142	0.0509423
DRG2	6.48348	0.207992
USMG5	6.43109	0.0202286
EIF2S2	6.42795	0.00219134
UBE2M	6.42217	0.00114678
EXOSC9	6.41816	0.119763
HM13	6.40876	0.00994558
CAPZB	6.3977	0.017125
PPP1CB	6.39322	0.00954524
PSMD1	6.32434	0.125598
SUCLG1	6.31322	0.0402549
NUP210	6.29661	0.118148
HDAC1	6.28299	0.0420775
PRSS3	6.273	0.00977732
TEX264	6.25614	0.00117816
TFG	6.20778	0.0397035
HSPA8	6.20698	0.0169816
ATP6V0D1	6.19865	0.046926
HMGB1	6.16048	0.00351554
NAA15	6.11544	0.00564759
ADSS	6.10279	0.0914241
TCEA1	6.09155	0.136228
NSDHL	6.06299	0.195035
THOP1	6.06142	0.0946354
ECHS1	6.05871	0.00376571
PRMT5	6.04677	0.0515531
PRPF6	6.03116	0.0060955
PRMT1	5.99671	0.0363804
NPC1	5.99069	0.0139515
BAZ1B	5.97978	0.0581684
WDR77	5.96571	0.0122559
HK1	5.94445	0.0135794
SEC63	5.93021	0.0168543
SNRPN	5.91802	0.00101481
CTH	5.91477	0.00030538
HSPG2	5.90905	0.00372621
SRSF9	5.88496	0.0215233
FABP5	5.86538	0.0432556
SCAMP1	5.82999	0.0857714
PHF5A	5.79972	0.0376563
ACACA	5.79692	0.0835961
PLIN3	5.75202	0.0111808
CTTN	5.71911	0.0349922
GLRX3	5.70693	0.0132756
RAB5C	5.67834	0.153944
STIP1	5.66356	0.0158147
LYPLA1	5.65722	0.0654042
RAB11A	5.65651	0.0229158
ATG3	5.64348	0.0751502
TOMM70	5.62937	0.0105764
ASNS	5.62892	0.0402484
TOR1AIP1	5.57885	0.00890513
TOP2A	5.53524	0.0303817
PCK2	5.50087	0.149257
ERO1A	5.49714	0.0159453
EBP	5.48031	0.066975
PHGDH	5.47621	0.0116612
PTK7	5.44122	0.00086507
RANBP1	5.38243	0.00568647
BOLA2	5.36594	0.065473
GSS	5.35609	0.0116265
FBL	5.34021	0.0157245
FAF2	5.33852	0.00735264
SNCA	5.33203	0.00409106
DCTPP1	5.31924	0.0452827
UPF1	5.29873	0.16917
SRM	5.29722	0.0349152
TSPAN6	5.29498	0.0384594
SAMHD1	5.27458	0.143508
MCM5	5.27234	0.0292694
VTA1	5.27158	0.20136
SEC61A1	5.26897	0.0249544
MTX2	5.26292	0.0322669
VAPA	5.25429	0.0124507
AP2M1	5.229	0.0221825
TPM3	5.21942	0.00477339
FLOT1	5.18961	0.0139546
EMD	5.16923	0.0100136
DDX6	5.16711	0.099076
DDX5	5.14062	0.0455639
DDX19A	5.13407	0.00639772
SUGT1	5.10452	0.234086
KIF11	5.09751	0.0328377
TLE3	5.09669	0.0557583
NSF	5.08012	0.0597816
PTGES2	5.06461	0.104064
COPG2	5.05218	0.0615717
NAP1L4	5.0449	0.0333457
PRPF19	5.03533	0.075129
SLC7A5	5.0294	0.0133549
NAE1	5.02736	0.0323565
RPL10A	5.01345	0.0361294
CTPS1	5.01036	0.0199895
DARS	4.98758	0.00292586
TMPO	4.92691	0.00587571
LUC7L2	4.9227	0.0401813
PAFAH1B1	4.89569	0.0395866
HMGB2	4.87643	0.0150034
ZC3HAV1	4.87592	0.0140064
LRRC47	4.85747	0.0251321
AASDHPPT	4.84905	0.13964
RHOA	4.8467	0.0149883
GSK3A	4.83728	0.245597
ANXA11	4.83424	0.0349831
RPL30	4.83115	0.0670336
MTDH	4.81134	0.0852376
RAB6A	4.8056	0.0206556
PCBP1	4.80374	0.0273708
DEK	4.79777	0.0718327
NANS	4.76699	0.0210782
PMPCB	4.72723	0.00195178
DDB1	4.72154	0.0324115
IMPDH2	4.71461	0.00429741
G6PD	4.70371	0.0035627
ACO2	4.67797	0.038802
PPP2CA	4.67707	0.105203
RAB21	4.67528	0.00934056
TXN	4.67219	0.0548991
NPEPPS	4.67125	0.0472338
CSTF3	4.64939	0.00344231
AKR1A1	4.62739	0.032579
FAF1	4.6255	0.00111333
SFXN3	4.62123	0.00497507
SYNGR2	4.59108	0.0661394
SEC61B	4.58457	0.0109548
DNAJA1	4.55586	0.0254066
ARHGDIA	4.55561	0.243295
CCT3	4.53915	0.0481279
FSCN1	4.51364	0.0581362
CKMT1A	4.49021	0.0273594
PNP	4.48549	0.223138
SCAMP4	4.48173	0.0116698
PFAS	4.46571	0.01294
GDI1	4.45863	0.0239655
EIF4G1	4.45032	0.00808759
RPL27	4.44888	0.0202629
VARS	4.4462	0.0438896
TTLL12	4.44298	0.0570936
PSMA7	4.42042	0.0136372
DDX17	4.41619	0.0109376
LARS	4.41323	0.0312886
SLC16A1	4.4003	0.0147562
HNRNPD	4.39677	0.00710528
FLNA	4.36356	0.003052
TTLL11	4.35423	0.0106931
ACTR3	4.3429	0.0360017
SMIM4	4.33713	0.0366507
AGK	4.32134	0.0492056
PSMD2	4.3125	0.0158226
HK2	4.31137	0.0901599
RBM39	4.30209	0.149033
EIF3E	4.3008	0.034154
ALDH9A1	4.29055	0.0575462
RPA2	4.28773	0.0221309
HSPB1	4.28048	0.0187862
SKP1	4.28017	0.0290305
MBNL1	4.27926	0.318569
UCHL3	4.27706	0.00918593
MAD2L1	4.27385	0.00094337
RBM22	4.25731	0.0166529
TFRC	4.25231	0.00364556
TMEM33	4.23523	0.0389931
HADHA	4.23311	0.0220609
KNOP1	4.19604	0.0271335
PSMD10	4.19527	0.136517
HSPH1	4.17096	0.0364954
SEPT11	4.16681	0.0190444
RPL15	4.16434	0.161781
FAM120A	4.15717	0.094617
LMAN2	4.15095	0.0108595
SF3B3	4.15024	0.0696678
SDHB	4.14541	0.0405741
GOT2	4.1376	0.026486
CNBP	4.13562	0.0520174
G3BP1	4.13413	0.132187
TUBB2B	4.1298	0.138617
UQCRC1	4.1273	0.0382114
HIST2H2BE	4.12538	0.0190243
SSR3	4.1072	0.160472
MRPL48	4.10433	0.0084559
HAT1	4.10113	0.0426524
MTHFD1L	4.09173	0.0547946
C21orf33	4.09056	0.224727
SRP9	4.08769	0.0242404
SLC9A3R1	4.08462	0.0922721
SSR4	4.07245	0.084138
RALA	4.05778	0.00389787
HMGB3	4.05527	0.0123763
PSMD3	4.05387	0.120707
AP1M1	4.02575	0.0289333
SARS	4.00767	0.0864438
PRDX3	4.00276	0.111173
FARSB	4.00231	0.0119027
RACK1	3.99652	0.0257247
DSG1	3.9957	0.0209038
RUVBL2	3.98754	0.0794318
LUC7L3	3.98374	0.0573221
CDK1	3.98234	0.0181923
SOD1	3.98196	0.0632906
LSM2	3.97444	0.142803
DBN1	3.97335	0.0359412
PGRMC1	3.97316	0.0479415
HNRNPL	3.97105	0.0145282
ABCD3	3.96977	0.0450894
ZC3H15	3.95793	0.0805329
RCC2	3.95769	0.00811876
GSTO1	3.95759	0.0889898
KHSRP	3.95166	0.02268
DYNLRB1	3.93274	0.240294
EWSR1	3.92792	0.0186691
DDX39B	3.92608	0.0586314
GFPT1	3.90163	0.0393623
TARS	3.90118	0.0128539
LBR	3.88916	0.0215552
RAB8A	3.88575	0.0133056
CANX	3.88545	0.0374355
ERP29	3.88522	0.019983
TOP1	3.88282	0.0327077
RPS16	3.87984	0.0412214
GTF2I	3.86599	0.0710581
DDX21	3.85397	0.0538708
PSMC1	3.84709	0.0604237
IGF2BP1	3.84297	0.053929
HNRNPUL1	3.84225	0.0503363
AHCY	3.84038	0.00473651
FAM98B	3.83739	0.0528157
QARS	3.83123	0.0319205
BUB3	3.82615	0.0107566
DIS3	3.8242	0.0136756
RPL37A	3.81143	2.443e-05
TNPO3	3.79137	0.0685792
DSC1	3.78054	0.211961
RANBP2	3.77338	0.0190162
CYB5R3	3.77245	0.0776526
HLA-C	3.77236	0.00240838
NKRF	3.77096	0.0503613
DRG1	3.76607	0.115663
PDHA1	3.76077	0.0221549
CDC42	3.76044	0.0139945
NCAPH	3.75206	0.0295235
RPS9	3.74977	0.0190899
CSNK2B	3.7458	0.092358
TUBA1B	3.74365	0.0727987
DNMT1	3.73998	0.0921336
SLC25A11	3.73898	0.0613195
FDPS	3.73628	0.132814
GLUD1	3.72814	0.00753463
PPID	3.71858	0.0657228
HBS1L	3.71618	0.096267
SMC2	3.71362	0.2405
SRI	3.69894	0.114468
PPP1CA	3.69772	0.0632088
DARS2	3.69719	0.506492
PDIA4	3.69714	0.0280114
ZC3HC1	3.67455	0.0584802
PSMB5	3.66923	0.00936004
HNRNPA3	3.66224	0.0327838
HNRNPM	3.65447	0.0425341
DCD	3.64069	0.102521
RPS27	3.64021	0.0521134
RPS6	3.63348	0.0318293
CPSF1	3.63209	0.0471824
PPP5C	3.63166	0.0707489
RPL18A	3.62633	0.00388001
PSMA6	3.62411	0.0293779
DLD	3.62359	0.0427184
IPO5	3.61939	0.0622372
RPS8	3.61039	0.0186734
ADSL	3.60806	0.0117814
STX7	3.60422	0.088601
ARL8B	3.60396	0.0514228
RPL7A	3.60366	0.0230452
CSK	3.6001	0.100271
DHX15	3.5927	0.0223706
ACTN4	3.58883	0.034066
ADAR	3.5879	0.0284447
EIF2S3	3.57544	0.0245963
GLUL	3.57024	0.0192447
KPNA1	3.55371	0.08569
IMMT	3.54123	0.202471
HSPA4	3.53481	0.0166078
CLTA	3.52859	0.0331639
HSPA5	3.5252	0.0296944
STRAP	3.51494	0.0138347
DDX39A	3.51246	0.00744146
PGD	3.50462	0.018155
PRPSAP2	3.49549	0.245743
RBM14	3.49389	0.0734862
PPP1CC	3.48819	0.0317043
PLD3	3.47452	0.0731061
VCP	3.47336	0.0348156
TBCA	3.47181	0.175884
CBS	3.46883	0.0207154
PCBP2	3.45941	0.0579869
XRCC6	3.45871	0.0390122
ISOC1	3.44967	0.242465
PCCB	3.4362	0.224923
NOP56	3.43488	0.043789
MGEA5	3.43365	0.0653677
RPL24	3.4213	0.0158177
GNAS	3.40365	0.0111251
STT3B	3.40247	0.0980087
RAC1	3.3969	0.0341169
DLST	3.39632	0.0145906
RPA1	3.38552	0.0122105
CPNE3	3.38113	0.0308959
TRIM28	3.37509	0.0589725
COPB1	3.36911	0.0967558
TROVE2	3.35353	0.174853
ATP2B3	3.35017	0.0922894
RAB7A	3.34579	0.0376423
TP53	3.34259	0.0569645
CHORDC1	3.33378	0.0316135
MMTAG2	3.33369	0.0113095
MRPL12	3.3283	0.134322
AKR1B1	3.3269	0.0530596
THOC5	3.32085	0.0852939
HSPBP1	3.30984	0.0773381
RCC1	3.2961	0.0208529
RAD50	3.28836	0.211518
CAP1	3.26644	0.0900197
ARPC1A	3.26334	0.071566
VAT1	3.26172	0.107466
MCM6	3.26151	0.00714553
TBCE	3.25608	0.361943
EML4	3.25199	0.195287
ZNF326	3.24252	0.0255795
MSH2	3.24074	0.0728141
SFXN1	3.23601	0.0872603
PTGES3	3.23231	0.0541306
SEC23A	3.22612	0.0735423
SLC3A2	3.22217	0.0843681
TKT	3.2195	0.0662015
CNP	3.2112	0.165565
PABPC1	3.21052	0.0844929
ST13	3.20695	0.0440141
FKBP4	3.20439	0.0328392
ERLIN1	3.20218	0.0460271
PSMA4	3.20194	0.0881752
PPP2R1A	3.19969	0.0609509
RPS4X	3.19953	0.112134
GNB1	3.19577	0.186105
EPRS	3.19513	0.0146588
CCAR2	3.19129	0.149479
CPVL	3.18315	0.0737233
EIF1AX	3.17627	0.1494
LARP7	3.15943	0.0770295
CACYBP	3.15679	0.048911
SRPRB	3.15581	0.0353456
SMARCA5	3.15337	0.0571191
KIF5B	3.15186	0.0755236
OSBP	3.14881	0.0170353
KARS	3.14213	0.0484439
COPA	3.13749	0.0466371
UCHL1	3.12403	0.0707586
APEX1	3.11508	0.0336426
COPB2	3.09933	0.00950666
SAR1A	3.09795	0.121582
NCSTN	3.09571	0.0241039
SRP72	3.08254	0.113898
CDC37	3.08103	0.112429
MAP2K2	3.07912	0.192616
SERPINB12	3.07082	0.134254
ERH	3.06815	0.0737046
RPL10	3.06272	0.0928913
PDLIM1	3.05759	0.130481
PDHB	3.04645	0.0968134
TOMM40	3.04573	0.16664
CFAP20	3.04463	0.00449842
BPNT1	3.04225	0.0625558
SNRPD2	3.04199	0.0027617
PCYOX1	3.03339	0.0224909
FUBP1	3.03232	0.0999329
RPL23	3.02083	0.179717
FKBP1A	3.01986	0.0519027
HNRNPH1	3.01972	0.165356
MAP4	3.0141	0.0724397
RPS20	3.00984	0.0223079
ABCF1	3.00817	0.0741903
EIF3L	3.00689	0.072566
AHSA1	3.0046	0.12597
ELAC2	3.00418	0.190564
RPS27A	2.99897	0.0741278
SLC25A5	2.99624	0.0907311
IARS2	2.98767	0.152373
P4HB	2.98752	0.0574163
RTCB	2.98751	0.0630727
RAB3GAP2	2.98135	0.0436975
RPL7	2.97412	0.0742022
PDIA6	2.97046	0.149446
RBM8A	2.95873	0.0689569
KCTD12	2.95871	0.0404738
RPS28	2.95621	0.105979
ECI1	2.95512	0.105853
ALDH18A1	2.95083	0.0636036
SERBP1	2.94635	0.0541259
RARS	2.93988	0.101501
EIF3D	2.92535	0.0448786
MLEC	2.92512	0.113048
RPS3A	2.92046	0.123674
TUBA1A	2.91661	0.18529
ATP6V1A	2.9125	0.12416
LETM1	2.9105	0.00466843
TBCB	2.90742	0.0415331
GAR1	2.90611	0.258224
CAPZA1	2.90424	0.0634812
PCMT1	2.90319	0.338767
GPHN	2.90253	0.0510418
MIF	2.89402	0.0526925
HNRNPH3	2.89316	0.118681
CCT8	2.89036	0.0422997
SEPT7	2.88771	0.1135
RPS15A	2.88321	0.0845732
UQCRC2	2.87704	0.0461974
H2AFY	2.8743	0.0944157
PSAT1	2.874	0.0947724
DYNC1I2	2.87242	0.0645624
BLVRB	2.86633	0.200011
EIF3I	2.86521	0.0318259
RPL18	2.86046	0.0647986
RBM25	2.85485	0.11413
GTPBP4	2.85342	0.148322
ATP6V1H	2.85268	0.0501998
ZC3H11A	2.85048	0.103521
UCHL5	2.84609	0.118757
ADRM1	2.84404	0.0775911
NACA	2.83409	0.0285255
UNC45A	2.83049	0.152544
NUDT5	2.82873	0.0494376
FXR1	2.82705	0.133916
RPL17	2.8266	0.058252
FARSA	2.82028	0.207487
EXOSC7	2.81562	0.338587
SUPT16H	2.81424	0.0582628
PPM1G	2.80417	0.0458228
HSPA9	2.80146	0.0699017
OAT	2.79775	0.187526
MCM2	2.78802	0.100179
RANGAP1	2.77965	0.188205
HSD17B12	2.77809	0.169428
PSMA5	2.77718	0.207596
RPL32	2.77568	0.0427133
HINT1	2.77474	0.148406
CHCHD3	2.76833	0.242182
ALDOA	2.76787	0.0545875
RPS2	2.75789	0.0810009
HSP90AA4P	2.75173	0.0896655
SCRN1	2.74735	0.0538955
NAXE	2.72485	0.186341
U2SURP	2.72227	0.0500225
SLIRP	2.71817	0.161751
PGAM5	2.71294	0.0844761
GRHPR	2.71207	0.130713
SNRPD3	2.7118	0.122156
DSTN	2.71172	0.306432
TRAP1	2.7059	0.0609674
PSMC5	2.69997	0.0854245
CAD	2.69593	0.0302598
SEC24C	2.69538	0.178876
VPS29	2.69488	0.299361
RPS24	2.6917	0.28524
PA2G4	2.68816	0.0527339
PCBD1	2.68583	0.203388
CBX3	2.68432	0.162014
HSP90AB1	2.6817	0.0593666
GPS1	2.67166	0.170771
POGZ	2.66661	0.237508
USP7	2.66474	0.255682
ACO1	2.6644	0.0471762
NPM3	2.65814	0.419541
TUFM	2.65743	0.148109
CKAP5	2.65741	0.138533
SRSF3	2.64883	0.133907
SRSF7	2.64813	0.0742114
CKAP2	2.64092	0.0115056
EIF3M	2.62814	0.177695
PARP1	2.62401	0.098777
PSMC6	2.62388	0.350162
PDCD6IP	2.61926	0.179246
PRDX1	2.6107	0.102548
UBE2K	2.60976	0.214123
NDUFS1	2.60569	0.263059
UBE2D2	2.60418	0.140527
MYL6	2.59172	0.155731
CUL4B	2.58553	0.131143
SUMO2	2.58394	0.0266741
GLOD4	2.58158	0.192695
UBE2E1	2.57982	0.133258
GMPS	2.57702	0.152656
NUP205	2.57606	0.156183
SUCLA2	2.57105	0.166405
VCL	2.56895	0.149966
GMDS	2.56751	0.294831
DHCR7	2.56149	0.108297
BCCIP	2.55704	0.278885
CBR1	2.55661	0.183118
VPS35	2.55572	0.0847491
CORO1C	2.5542	0.180419
RPL36	2.54948	0.0906791
RPL19	2.54868	0.113672
GLO1	2.54672	0.12772
IRS4	2.53913	0.0396809
PARK7	2.53574	0.176038
STT3A	2.53382	0.011091
RPL26	2.53239	0.0431284
ADD1	2.53108	0.202658
TIAL1	2.52915	0.0443902
ACTC1	2.52859	0.197154
PYCR1	2.52617	0.187569
PCNP	2.52489	0.0772001
DCTN2	2.51751	0.242291
CYFIP1	2.515	0.0270832
FEN1	2.51358	0.248691
RNPEP	2.50605	0.283248
RPL34	2.50551	0.0171653
TOMM20	2.504	0.268456
RPL12	2.5	0.0834058
ELOC	2.49926	0.165768
TALDO1	2.49151	0.133281
AIFM1	2.48457	0.0437966
NONO	2.47583	0.122918
EBNA1BP2	2.47507	0.2816
MTHFD1	2.4744	0.13392
PIN4	2.47229	0.161427
SND1	2.46167	0.0884151
DDX3X	2.45839	0.174422
LDHA	2.45693	0.0804767
RPL4	2.45447	0.0872595
SMC3	2.45236	0.0682212
XRN2	2.44806	0.0259581
MDH2	2.44345	0.16371
SUMO1	2.44283	0.11124
IGF2BP3	2.43721	0.23365
ARCN1	2.4329	0.170151
RPL22	2.42973	0.11218
AARS	2.42351	0.21543
PYGL	2.42121	0.174257
WDR18	2.41595	0.14963
MRPS22	2.41224	0.234546
UBE2V2	2.40587	0.0565461
PPA1	2.40442	0.176183
RPS11	2.40317	0.0743776
MARS	2.396	0.171572
PEBP1	2.39301	0.186573
EIF4A1	2.39276	0.142573
SYNCRIP	2.39198	0.218372
HDGFL2	2.39187	0.230078
EIF3B	2.39087	0.150535
HNRNPR	2.38353	0.189516
HDGF	2.38336	0.218622
PPIL1	2.37633	0.214638
MT-CO2	2.37208	0.175808
ENO1	2.36989	0.159397
PGLS	2.36756	0.237404
RPL35A	2.36701	0.107102
PSMA3	2.36323	0.214507
HNRNPAB	2.36167	0.0980606
RPL5	2.35489	0.0751154
RPL27A	2.34872	0.144876
HSP90AA1	2.34674	0.158796
PSMC2	2.34376	0.052328
RRM1	2.34063	0.212982
JUP	2.33415	0.0519414
RPS14	2.32637	0.0386032
PPP3CA	2.3249	0.316335
MYBBP1A	2.32251	0.246622
RBBP4	2.3225	0.179628
PPIA	2.32069	0.256541
SDHA	2.32046	0.129295
PGK1	2.3145	0.207099
WDR5	2.31429	0.189822
BOP1	2.31352	0.500551
RPS3	2.31276	0.101274
PFN1	2.3126	0.143067
IARS	2.31047	0.167169
SLC1A5	2.31028	0.176328
MYO6	2.30942	0.206465
CAT	2.30681	0.0557565
DCTN1	2.30377	0.143792
LMNB1	2.29846	0.112007
PRDX6	2.29819	0.17992
SARNP	2.29649	0.133028
RAP1B	2.29356	0.200649
RPL13	2.2906	0.155591
COPG1	2.28906	0.243309
RPL36AL	2.28543	0.338555
EFTUD2	2.28063	0.202338
SEPT9	2.27877	0.108346
TARDBP	2.27725	0.0830335
YWHAE	2.27537	0.14349
GART	2.27355	0.15852
TPT1	2.27326	0.282908
RPL29	2.27179	0.0695639
RPL8	2.26721	0.138115
RPL11	2.26563	0.100158
CYB5B	2.26519	0.243255
ACTB	2.26501	0.335851
LDAH	2.26028	0.317955
CLIC1	2.2599	0.167476
EZR	2.25829	0.204231
SBDS	2.24348	0.144112
OTUB1	2.24218	0.185125
SGTA	2.24059	0.1802
MCM7	2.22698	0.0940844
DSP	2.22163	0.0319657
RAN	2.21824	0.141812
LMNA	2.21406	0.0661945
IDH3A	2.21365	0.255879
EIF3G	2.1988	0.0997281
PAICS	2.19713	0.240918
NDUFS6	2.19134	0.0623658
RPS25	2.18719	0.182125
PSMB7	2.18365	0.322106
HNRNPA1	2.18258	0.130431
CARM1	2.18182	0.259421
PRPS1	2.17703	0.190953
PCNA	2.176	0.201471
YARS	2.17508	0.140188
IPO4	2.17326	0.353848
ALDH7A1	2.17164	0.261636
COPZ1	2.16605	0.23149
SF1	2.16164	0.394224
PLS3	2.15905	0.225902
MAPRE1	2.15692	0.364052
SNRNP200	2.15453	0.2425
EIF2S1	2.15312	0.164513
GDI2	2.15239	0.228583
ANKLE2	2.15187	0.104132
SNX3	2.1509	0.145158
DDX1	2.15021	0.289407
MYL12A	2.14928	0.276008
PSMB4	2.14795	0.174651
HSP90B1	2.14463	0.183806
MDH1	2.13753	0.266544
SRSF4	2.13584	0.146792
PDIA3	2.12561	0.216199
ZC3HAV1L	2.12479	0.108524
HNRNPA2B1	2.12139	0.147879
CA2	2.11598	0.179611
TMED9	2.11459	0.311017
LDHB	2.10333	0.202074
SEC31A	2.09484	0.399323
BLVRA	2.08842	0.220092
ABCE1	2.07971	0.244213
DHX9	2.07814	0.252549
SFPQ	2.07529	0.215497
ANP32B	2.07395	0.41683
RAB1B	2.07272	0.318128
SNRNP40	2.06957	0.228485
LRPPRC	2.0677	0.137654
NAP1L1	2.065	0.473529
HNRNPA0	2.05906	0.317549
SLC25A3	2.05769	0.0507196
HSPD1	2.05195	0.291778
YWHAH	2.05098	0.153616
CSNK2A1	2.05012	0.463599
CLIC4	2.04783	0.381352
EEF1G	2.04731	0.276986
TUBB4A	2.04587	0.417441
MSN	2.04498	0.174526
SART3	2.04232	0.359667
USO1	2.03632	0.0917136
ARF5	2.02491	0.142191
FASN	2.02018	0.278523
HCFC1	2.01817	0.33002
DCXR	2.01474	0.0893542
AP1B1	2.01401	0.347658
VBP1	2.00881	0.381605
MAT2B	2.00863	0.378812
PSMA1	2.00752	0.397685
COX4I1	2.00715	0.420205
GNL3	2.00713	0.171946
DDT	2.00505	0.44073
HIBADH	2.00377	0.352156
GGCT	2.00303	0.206896
HNRNPC	1.99856	0.237687
IQGAP1	1.99653	0.284654
XPO1	1.99652	0.386003
ACLY	1.98833	0.274559
HNRNPK	1.97927	0.277328
PRKDC	1.97321	0.311366
ANXA2	1.97306	0.295778
SMC1A	1.96094	0.165419
YTHDF2	1.96011	0.276718
RUVBL1	1.95467	0.326219
TXNDC5	1.94761	0.259681
PSMB1	1.94064	0.315673
API5	1.93742	0.410131
CTSD	1.93673	0.264161
RPL14	1.93629	0.28934
ELAVL1	1.93149	0.234693
THRAP3	1.92366	0.393508
HSPA1B	1.9166	0.298489
HSD17B10	1.91402	0.358219
SHMT2	1.90915	0.2736
CLTC	1.90407	0.239187
LSM12	1.90062	0.242613
DBNL	1.89591	0.225902
NMT1	1.89469	0.426314
TUBB	1.89243	0.329906
SNRNP70	1.89211	0.177408
RPL3	1.89139	0.178988
PPP2R2A	1.88714	0.25444
WARS	1.88306	0.343271
PFN2	1.87639	0.280519
UBA1	1.87537	0.376037
ATP5O	1.87266	0.27594
TRA2B	1.86944	0.159676
ACADM	1.8693	0.37695
DDX18	1.86634	0.390213
SRSF1	1.86557	0.298698
SLC6A15	1.864	0.364182
KPNA2	1.8621	0.431761
CAND1	1.86184	0.383276
PKM	1.86031	0.352401
VIM	1.85842	0.121375
PABPC4	1.85701	0.355511
SNRPF	1.85269	0.21806
DFFA	1.84714	0.570073
U2AF1	1.83932	0.313043
PEPD	1.83328	0.477713
MCM3	1.83284	0.429143
APRT	1.83025	0.352162
PHB2	1.82789	0.248587
SNX2	1.81611	0.494794
CCT7	1.80836	0.348714
TPI1	1.80356	0.364713
ATIC	1.79263	0.43504
DKC1	1.79189	0.370466
WDR12	1.79125	0.438819
RPL13A	1.78763	0.218428
KPNB1	1.77943	0.407042
CSDE1	1.77808	0.505827
POLR1C	1.77461	0.528247
ARF4	1.77012	0.321755
LMNB2	1.76987	0.22158
CCT4	1.76659	0.386902
NAMPT	1.76575	0.486055
NOP2	1.76358	0.408839
RPL7L1	1.75412	0.47545
PGP	1.75201	0.265601
RPN1	1.75078	0.179033
CS	1.75058	0.528326
JPT2	1.74313	0.249424
RAB10	1.73884	0.303564
HNRNPF	1.73847	0.42305
IPO7	1.73738	0.453819
COPS3	1.73137	0.348414
TAGLN2	1.72842	0.460472
ATP5H	1.72456	0.505027
BCAP31	1.72337	0.240416
CNN3	1.71965	0.48024
NUDC	1.71916	0.453153
PSMB6	1.71393	0.264368
SSRP1	1.71318	0.468617
FH	1.71226	0.44619
HNRNPDL	1.71216	0.426027
GSPT2	1.70885	0.519661
HPRT1	1.70587	0.479803
YWHAZ	1.7052	0.353487
TUBB4B	1.70338	0.437615
NOP58	1.70089	0.459024
POLR2H	1.69915	0.559158
HADH	1.69409	0.380776
SNRPG	1.69288	0.482219
GANAB	1.68173	0.479351
GAPDH	1.68084	0.413801
PRPF8	1.67084	0.497693
EEF1D	1.66902	0.506682
ESD	1.66728	0.46483
RPS5	1.65735	0.537834
RPL28	1.65717	0.182577
SPTBN1	1.65505	0.440186
SFN	1.64943	0.189672
ACBD3	1.64417	0.531389
HNRNPU	1.64191	0.437331
SRRT	1.6408	0.517475
EEF1B2	1.63917	0.449126
TMEM97	1.63159	0.165039
ILF3	1.6215	0.511934
PGM2	1.61809	0.55278
SF3B1	1.61353	0.526467
PRDX4	1.60969	0.502271
RAD23A	1.60759	0.367562
MKNK1	1.60181	0.490572
SMC4	1.60116	0.211983
DDX46	1.59985	0.571607
RPS23	1.59736	0.456807
ETF1	1.58962	0.439487
FKBP3	1.58168	0.49368
CTNNA1	1.57809	0.590742
MTAP	1.57025	0.609021
ATAD3B	1.56974	0.350483
PAFAH1B3	1.56903	0.628731
CCT6A	1.56375	0.559607
ETFB	1.56259	0.580458
HSPA6	1.56211	0.488321
EEF2	1.55923	0.523767
SNU13	1.55607	0.518916
CSE1L	1.54859	0.591482
PUF60	1.54444	0.604351
SNRPA1	1.53993	0.539982
HDLBP	1.53886	0.307298
MARCKSL1	1.53699	0.525439
MRI1	1.52726	0.616405
NUP153	1.52201	0.457753
GSTM3	1.51219	0.541694
RPL23A	1.50123	0.55113
CAPN2	1.49952	0.614265
PRKCSH	1.49331	0.572539
MYH9	1.49229	0.551086
PSMC3	1.49149	0.64748
CALR	1.48547	0.587688
BAX	1.46734	0.687203
SEPT2	1.4668	0.626949
PSMD4	1.46506	0.610659
PSMB2	1.45561	0.693732
TCP1	1.45472	0.567162
RPL6	1.45209	0.493975
USP5	1.44843	0.638609
SNW1	1.44442	0.627615
ACTG1	1.44158	0.554169
GSTP1	1.44007	0.641333
UQCRFS1	1.42957	0.583356
HSD17B4	1.42176	0.550321
EIF6	1.42042	0.666666
RRP1	1.41525	0.776119
FUS	1.41524	0.533025
CPSF7	1.4089	0.622969
NVL	1.39896	0.369925
COX7A2	1.3932	0.680776
HACD3	1.39287	0.644559
SSBP1	1.38835	0.564859
TMED2	1.38734	0.606705
GORASP2	1.38541	0.594417
MAGOH	1.37981	0.698731
U2AF2	1.37395	0.712553
SAE1	1.37249	0.704444
TRMT1L	1.35907	0.633005
EIF3A	1.3537	0.73226
CCT2	1.34911	0.722668
PGM1	1.3461	0.713378
RPLP0	1.34577	0.739465
GARS	1.33775	0.68726
SF3A1	1.32854	0.740636
PSPC1	1.3193	0.683521
YWHAB	1.30896	0.71096
EIF3H	1.30571	0.454243
RPL9	1.30274	0.742468
EIF4A3	1.29541	0.736043
DDOST	1.28653	0.745619
PHB	1.27677	0.764875
SPTAN1	1.27563	0.790574
PRKAR2A	1.26629	0.71522
USP39	1.2539	0.737813
CCT5	1.25387	0.801463
TBL2	1.25156	0.433864
PCCA	1.24436	0.428915
PSMB3	1.2309	0.838269
SRSF2	1.22705	0.75139
SMU1	1.22201	0.735123
MRPS27	1.22176	0.863696
PGAM1	1.2191	0.83615
SRP14	1.21637	0.830067
LAP3	1.21294	0.812929
SNRPE	1.20937	0.846701
PHPT1	1.20822	0.725314
MCCC1	1.20678	0.583262
YWHAG	1.20595	0.755763
PRDX2	1.20121	0.817947
PTPN11	1.19175	0.820586
NAT10	1.19066	0.840274
EEF1A1P5	1.18206	0.811636
LONP1	1.17534	0.861499
HIST2H3A	1.17216	0.844061
ACAT1	1.16869	0.855196
SSB	1.1671	0.842779
PRDX5	1.16459	0.86844
UBA2	1.15687	0.863111
RPN2	1.15476	0.861463
SERPINH1	1.1538	0.871037
EIF4B	1.13502	0.848226
ACTR1A	1.13273	0.899913
LIG3	1.12179	0.91726
HLCS	1.11303	0.892404
MATR3	1.11187	0.903421
PC	1.1081	0.661304
TLN1	1.10799	0.910628
NPM1	1.10615	0.900192
NCL	1.10508	0.881532
ACTR2	1.08842	0.928958
BCLAF1	1.08737	0.889219
NME1	1.08399	0.933479
RPS17	1.07632	0.941406
TOMM22	1.06691	0.826525
MTHFD2	1.06668	0.950808
ATP5A1	1.05467	0.951967
ILF2	1.05177	0.960713
TIPRL	1.05078	0.953266
NUP93	1.044	0.964589
RPL38	1.04383	0.962846
YWHAQ	1.04364	0.9621
NASP	1.04046	0.966738
PSMD13	1.02865	0.974601
PSMD12	1.0221	0.98281
PTPA	1.00977	0.991821
GOT1	1.0009	0.99932
NUMA1	0.982999	0.983611
MARCKS	0.980369	0.984614
XRCC5	0.977399	0.982097
KHDRBS1	0.963955	0.970171
RBMX	0.958539	0.962369
WDR61	0.930043	0.943775
ETFA	0.922436	0.944146
ENAH	0.92073	0.936185
RPS21	0.913628	0.917968
SHROOM3	0.910036	0.875885
ARPC2	0.886082	0.909889
UBE2N	0.867729	0.872495
PSMD14	0.856287	0.890802
SLC25A6	0.84656	0.866868
BROX	0.837889	0.840572
LSM8	0.835458	0.878836
GCN1	0.834511	0.835995
H2AFV	0.830928	0.844092
RPS7	0.823219	0.850516
CPNE1	0.822202	0.876765
ATP5C1	0.817216	0.86282
LSM4	0.816735	0.87222
RPS12	0.809844	0.84885
STOML2	0.794229	0.842773
CKB	0.772884	0.820922
TBL3	0.76463	0.754983
TPP1	0.76214	0.836506
ATP5F1	0.753727	0.676714
RPSA	0.744728	0.807794
LARP1	0.743765	0.815186
CFL1	0.743291	0.794588
NME2	0.737054	0.803261
ARF1	0.72646	0.779209
MYH10	0.700892	0.772032
HINT2	0.682521	0.746599
PTBP1	0.680068	0.735659
RBBP7	0.679052	0.758089
SMARCC1	0.676748	0.778868
C14orf166	0.670555	0.763424
EIF5A	0.663555	0.635238
SRRM2	0.651314	0.705821
ANXA5	0.633057	0.691543
USP9X	0.630725	0.726658
DNM2	0.622198	0.731943
RAD23B	0.614509	0.702695
UROD	0.611434	0.73527
NUTF2	0.606877	0.684341
EIF4H	0.595538	0.699105
AK2	0.594019	0.696042
IDH1	0.589049	0.675865
SNRPD1	0.572322	0.682985
ANXA6	0.564072	0.70534
ANP32A	0.554039	0.587309
ATP5B	0.540323	0.657159
HUWE1	0.52638	0.636449
OLA1	0.526318	0.657528
DYNC1H1	0.52136	0.641054
HP1BP3	0.520757	0.679887
RPS26	0.509112	0.549721
IPO9	0.499157	0.662178
CLNS1A	0.493267	0.642175
ESYT1	0.46552	0.637058
UBE2L3	0.452438	0.571037
PSMD7	0.392472	0.585752
CALM3	0.373908	0.484417
UFM1	0.371202	0.566907
GRWD1	0.36495	0.568727
HSPE1	0.33594	0.521472
COX5A	0.330406	0.572167
C1QBP	0.32085	0.47078
EIF3K	0.318398	0.54603
RSL1D1	0.304807	0.532405
DNAJA2	0.29692	0.5459
RPS18	0.264358	0.503576
RPA3	0.260942	0.537131
NDUFA5	0.243122	0.514848
RPL31	0.208867	0.455495
PSME3	0.197564	0.444076
HIST1H4A	0.195274	0.492349
YBX1	0.184576	0.480653
HIST1H1C	0.158395	0.445699
RPL35	0.14012	0.46804
HIST1H2BM	0.132488	0.464704
MRTO4	0.130053	0.467822
EEF1E1	0.12907	0.471808
HSP90AB2P	0.123892	0.471988
HIST1H2AJ	0.0972662	0.45818
SET	0.0931752	0.453515
RPLP2	0.0854073	0.455906
RPLP1	0.0263395	0.411054
