# Supplementary material
Source: Research Square preprint supplement (doi:10.21203/rs.3.rs-6562222/v1)
Supplement: Supplementary file 1 [file a27db3e8998085fb444e5c42.pdf]

## General chemical experimental information

Unless otherwise noted, reagents and solvents were obtained from commercial suppliers. Reactions were run in round bottom flasks or glass vials and stirred with Teflon-coated magnetic stir bars. Reactions were monitored by thin layer chromatography or LC-MS (Agilent 6120). Acquity H-Class LC-MS with QDa mass spectrometer using water + 0.05% formic acid and acetonitrile + 0.05% formic acid. Preparative HPLC was performed on a Waters Sunfire C18 column (19 × 100 mm, 5 $\mu$ m) at a flow rate of 15 mL/min. All final compounds were >95% pure by LC-MS analysis. <sup>1</sup>H NMR spectra were recorded at ambient temperature on Bruker DMX 400 (400 MHz for <sup>1</sup>H NMR) instruments in the specified deuterated solvents.

### Scheme 1. Synthesis of compounds PiB and 3, 4, 6

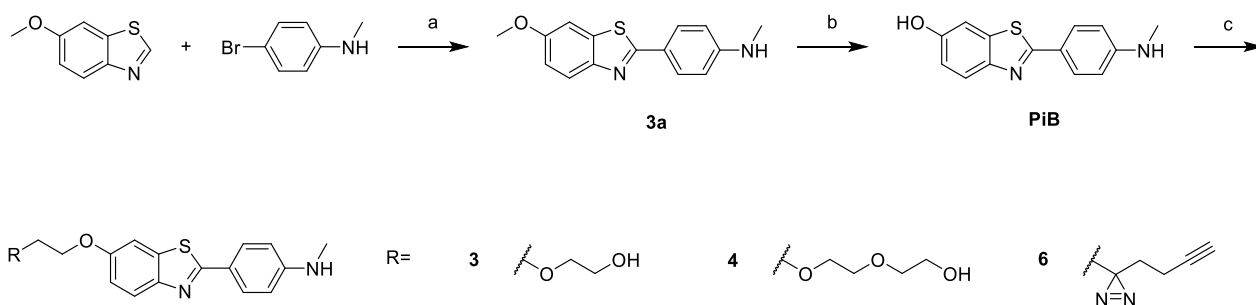

Reagent condition: a) Pd(AcO)<sub>2</sub>, P(<sup>t</sup>Bu)<sub>3</sub>, CuI, Cs<sub>2</sub>CO<sub>3</sub>, DMF, 150°C, N<sub>2</sub>, 4 h; b) BBr<sub>3</sub>, DCM, -78°C to room temperature (R.T.), N<sub>2</sub>, 3 h; c) Cs<sub>2</sub>CO<sub>3</sub>, DMF, room temperature (R.T.), 1 h.

### 4-(6-methoxybenzo[d]thiazol-2-yl)-N-methylaniline (3a)

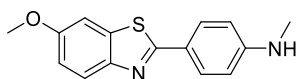

A solution of 6-methoxybenzo[d]thiazole (3.5 g, 21.2 mmol), 4-bromo-N-methylaniline (4.73 g, 25.5 mmol) and Cs<sub>2</sub>CO<sub>3</sub> (7.6 g, 23.3 mmol) in anhydrous DMF (250 mL) was degassed with N<sub>2</sub> for 15 min. To this solution were sequentially added Pd(AcO)<sub>2</sub> (240 mg, 1.05 mmol), P(<sup>t</sup>Bu)<sub>3</sub> (430 mg, 2.12 mmol) and CuI (800 mg, 4.25 mmol) under N<sub>2</sub> atmosphere. The reaction mixture was stirred at 150°C for 4 h. After cooling to room temperature, it was diluted by water (200 mL) and extracted with EA (3 × 50 mL). The combined organic layers were dried over anhydrous Na<sub>2</sub>SO<sub>4</sub>, filtered, and concentrated under reduced pressure. Then the crude product was purified by flash column chromatography on silica gel using a gradient eluent (PE/EA = 100:0 to 70:30). Compound 3a was obtained by vacuum drying as

yellow solid (720 mg, 2.67 mmol) with a yield of 25.2%. <sup>1</sup>H NMR (400 MHz, DMSO-*d*<sub>6</sub>) δ 7.83 – 7.70 (m, 3H), 7.61 (d, *J* = 1.9 Hz, 1H), 7.05 (dd, *J* = 8.9, 2.3 Hz, 1H), 6.64 (d, *J* = 8.6 Hz, 2H), 6.39 (d, *J* = 3.9 Hz, 1H), 3.83 (s, 3H), 2.75 (d, *J* = 3.5 Hz, 3H). MS-ESI: *m/z* calculated for C<sub>15</sub>H<sub>14</sub>N<sub>2</sub>OS, Exact Mass: 270.08, found 271.1 [M + H]<sup>+</sup>.

### 2-(4-(methylamino)phenyl)benzo[*d*]thiazol-6-ol (PiB)

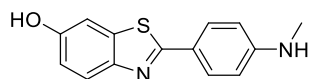

A solution of compound **3a** (720 mg, 2.67 mmol) in anhydrous DCM (10 mL) was treated with BBr<sub>3</sub> (9.6 mL, 1 M in DCM) at -78°C under N<sub>2</sub> atmosphere. After complete addition, the reaction mixture was allowed to warm to room temperature and stirred for 3 h. The reaction was quenched by careful addition to ice-water (20 mL), followed by extraction with DCM (3 × 15 mL). The combined organic layers were dried over anhydrous Na<sub>2</sub>SO<sub>4</sub>, filtered, and concentrated under reduced pressure. The crude product was purified by flash column chromatography on silica gel using a gradient eluent (DCM/EA = 100:0 to 10:90). **PiB** was obtained by vacuum drying as yellow solid (503 mg, 1.96 mmol) with a yield of 73.4%. <sup>1</sup>H NMR (400 MHz, DMSO-*d*<sub>6</sub>) δ 7.73 (d, *J* = 8.7 Hz, 2H), 7.70 (d, *J* = 8.8 Hz, 1H), 7.32 (d, *J* = 2.2 Hz, 1H), 6.90 (dd, *J* = 8.7, 2.4 Hz, 1H), 6.63 (d, *J* = 8.7 Hz, 2H), 2.75 (s, 3H). MS-ESI: *m/z* calculated for C<sub>14</sub>H<sub>12</sub>N<sub>2</sub>OS, Exact Mass: 256.07, found 257.1 [M + H]<sup>+</sup>.

### 2-(2-((2-(4-(methylamino)phenyl)benzo[*d*]thiazol-6-yl)oxy)ethoxy)ethan-1-ol (**3**)

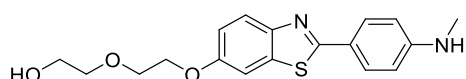

A solution of 2-(2-hydroxyethoxy)ethyl 4-methylbenzenesulfonate (94 mg, 0.36 mmol) and **PiB** (31 mg, 0.12 mmol) in anhydrous DMF (1 mL) was added Cs<sub>2</sub>CO<sub>3</sub> (59 mg, 0.18 mmol). The reaction mixture was stirred at room temperature for 1 h, then diluted with a H<sub>2</sub>O/DMSO mixture and purified by high-performance liquid chromatography using a gradient eluent (H<sub>2</sub>O/MeCN = 90:10 to 20:80). Compound **3** was obtained by lyophilization as yellow solid (12.1 mg, 0.035 mmol) with a yield of 30.1%. <sup>1</sup>H NMR (400 MHz, DMSO-*d*<sub>6</sub>) δ 7.78 (d, *J* = 8.9 Hz, 1H), 7.76 (d, *J* = 8.7 Hz, 2H), 7.62 (d, *J* = 2.3 Hz, 1H), 7.06 (dd, *J* = 8.9, 2.5 Hz, 1H), 6.64 (d, *J* = 8.7 Hz, 2H), 4.22 – 4.14 (m, 2H), 3.80 – 3.76 (m, 2H), 3.54 – 3.50 (m, 4H), 2.75 (s, 3H). MS-ESI: *m/z* calculated for C<sub>18</sub>H<sub>20</sub>N<sub>2</sub>O<sub>3</sub>S, Exact Mass: 344.12, found 345.0 [M + H]<sup>+</sup>.

#### 2-(2-(2-((2-(4-(methylamino)phenyl)benzo[d]thiazol-6-yl)oxy)ethoxy)ethoxy)ethan-1-ol (4)

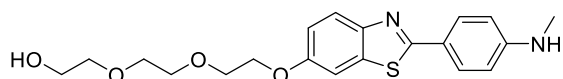

A solution of 2-(2-(2-hydroxyethoxy)ethoxy)ethyl 4-methylbenzenesulfonate (14 mg, 0.05 mmol) and **PiB** (10 mg, 0.04 mmol) in anhydrous DMF (1 mL) was added Cs<sub>2</sub>CO<sub>3</sub> (20 mg, 0.06 mmol). The reaction mixture was stirred at room temperature for 1 h, then diluted with a H<sub>2</sub>O/DMSO mixture and purified by high-performance liquid chromatography using a gradient eluent (H<sub>2</sub>O/MeCN = 90:10 to 20:80). Compound **4** was obtained by lyophilization as yellow solid (4.1 mg, 0.011 mmol) with a yield of 26.5%. <sup>1</sup>H NMR (400 MHz, CDCl<sub>3</sub>) δ 7.88 (d, *J* = 8.6 Hz, 3H), 7.34 (d, *J* = 2.2 Hz, 1H), 7.08 (dd, *J* = 8.9, 2.5 Hz, 1H), 6.65 (d, *J* = 8.7 Hz, 2H), 4.25 – 4.18 (m, 2H), 3.93 – 3.87 (m, 2H), 3.78 – 3.70 (m, 6H), 3.64 – 3.61 (m, 2H), 2.91 (s, 3H). MS-ESI: *m/z* calculated for C<sub>20</sub>H<sub>24</sub>N<sub>2</sub>O<sub>4</sub>S, Exact Mass: 388.15, found 389.1 [M + H]<sup>+</sup>.

#### 4-(6-(2-(3-(but-3-yn-1-yl)-3H-diazirin-3-yl)ethoxy)benzo[d]thiazol-2-yl)-*N*-methylaniline (6)

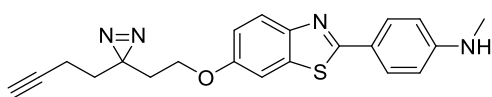

A solution of **PiB** (20 mg, 0.08 mmol) and 2-(3-(but-3-yn-1-yl)-3H-diazirin-3-yl) ethyl 4-methylbenzenesulfonate (27 mg, 0.09 mmol) in anhydrous DMF (1 mL) was added Cs<sub>2</sub>CO<sub>3</sub> (52 mg, 0.16 mmol). The reaction mixture was stirred at 50°C for 12 h, then diluted with a H<sub>2</sub>O/DMSO mixture and purified by high-performance liquid chromatography using a gradient eluent (H<sub>2</sub>O/MeCN = 80:20 to 20:80). Compound **6** was obtained by lyophilization as yellow solid (13.1 mg, 0.035 mmol) with a yield of 44.6%. <sup>1</sup>H NMR (400 MHz, DMSO-*d*<sub>6</sub>) δ 7.80 (s, 1H), 7.77 (d, *J* = 8.8 Hz, 2H), 7.60 (d, *J* = 2.3 Hz, 1H), 7.05 (dd, *J* = 8.9, 2.4 Hz, 1H), 6.64 (d, *J* = 8.7 Hz, 2H), 3.90 (t, *J* = 6.1 Hz, 2H), 2.84 (t, *J* = 2.6 Hz, 1H), 2.50 (s, 3H), 2.06 (td, *J* = 7.3, 2.5 Hz, 2H), 1.92 (t, *J* = 6.0 Hz, 2H), 1.68 (t, *J* = 7.4 Hz, 2H). MS-ESI: *m/z* calculated for C<sub>21</sub>H<sub>20</sub>N<sub>4</sub>OS, Exact Mass: 376.14, found 377.1 [M + H]<sup>+</sup>.

#### Scheme 2. Synthesis of compounds 1 and 2

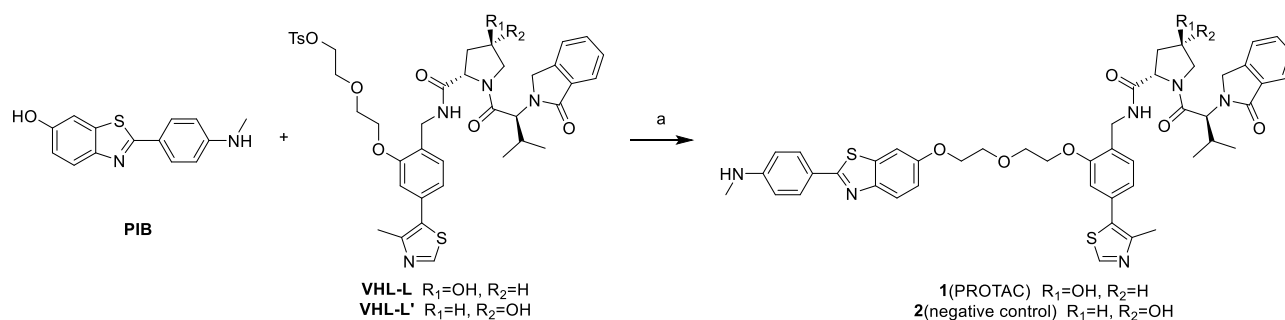

Reagent condition: a)  $\text{Cs}_2\text{CO}_3$ , DMSO,  $70^\circ\text{C}$ , overnight.

**(2*S*,4*R*)-4-hydroxy-1-((*S*)-3-methyl-2-(1-oxoisindolin-2-yl)butanoyl)-*N*-(2-(2-(2-((2-(4-(methylamino)phenyl)benzo[*d*]thiazol-6-yl)oxy)ethoxy)ethoxy)-4-(4-methylthiazol-5-yl)benzyl)pyrrolidine-2-carboxamide (1)**

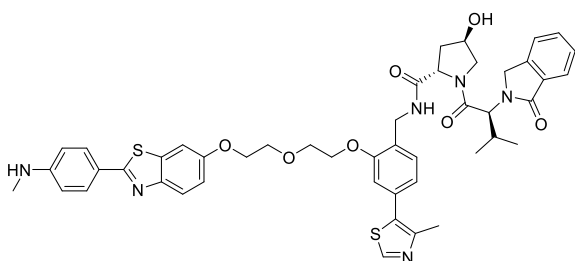

A solution of **PiB** (13 mg, 0.05 mmol) and **VHL-L** (40 mg, 0.05 mmol) in anhydrous DMSO (1 mL) was added  $\text{Cs}_2\text{CO}_3$  (32.5 mg, 0.10 mmol). The reaction mixture was stirred at  $70^\circ\text{C}$  overnight, then diluted with a  $\text{H}_2\text{O}/\text{DMSO}$  mixture and purified by high-performance liquid chromatography using a gradient eluent ( $\text{H}_2\text{O}/\text{MeCN} = 80:20$  to  $20:80$ ). Compound **1** was obtained by lyophilization as yellow solid (11.2 mg, 0.013 mmol) with a yield of 25.6%.  $^1\text{H}$  NMR (400 MHz,  $\text{DMSO}-d_6$ )  $\delta$  8.91 (s, 1H), 8.32 (d,  $J = 5.7$  Hz, 1H), 7.70 (dd,  $J = 8.5, 5.8$  Hz, 3H), 7.64 (d,  $J = 7.4$  Hz, 1H), 7.54 (d,  $J = 2.6$  Hz, 3H), 7.47 – 7.40 (m, 1H), 7.28 (d,  $J = 7.7$  Hz, 1H), 7.03 – 6.97 (m, 2H), 6.95 (d,  $J = 7.9$  Hz, 1H), 6.57 (d,  $J = 8.6$  Hz, 2H), 4.64 (d,  $J = 10.8$  Hz, 1H), 4.51 – 4.45 (m, 1H), 4.41 (s, 1H), 4.38 – 4.34 (m, 1H), 4.34 – 4.28 (m, 1H), 4.30 – 4.20 (m, 3H), 4.19 – 4.12 (m, 4H), 3.85 – 3.80 (m, 4H), 3.72 – 3.70 (m, 1H), 3.63 – 3.62 (m, 1H), 2.68 (s, 3H), 2.40 (s, 3H), 2.29 – 2.22 (m, 1H), 2.02 – 1.95 (m, 1H), 1.90 – 1.80 (m, 1H), 0.89 (d,  $J = 6.3$  Hz, 3H), 0.66 (d,  $J = 6.5$  Hz, 3H). MS-ESI:  $m/z$  calculated for  $\text{C}_{47}\text{H}_{50}\text{N}_6\text{O}_7\text{S}_2$ , Exact Mass: 874.32, found 875.1  $[\text{M} + \text{H}]^+$ .

**(2*S*,4*S*)-4-hydroxy-1-((*S*)-3-methyl-2-(1-oxoisindolin-2-yl)butanoyl)-*N*-(2-(2-(2-((2-(4-(methylamino)phenyl)benzo[*d*]thiazol-6-yl)oxy)ethoxy)ethoxy)-4-(4-methylthiazol-5-**

## yl)benzyl)pyrrolidine-2-carboxamide (2)

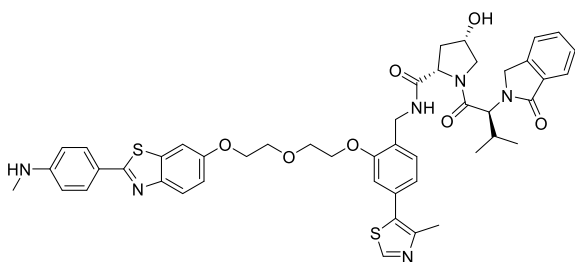

Compound **2** was obtained by the procedure of compound **1** as yellow solid (8.6 mg, 0.010 mmol) with a yield of 19.7%. <sup>1</sup>H NMR (400 MHz, DMSO-*d*<sub>6</sub>) δ 8.99 (s, 1H), 8.42 (s, 1H), 7.77 (dd, *J* = 7.1, 4.9 Hz, 3H), 7.71 (d, *J* = 7.6 Hz, 1H), 7.61 (s, 3H), 7.53 – 7.47 (m, 1H), 7.37 (d, *J* = 7.8 Hz, 1H), 7.10 – 7.03 (m, 2H), 7.01 (d, *J* = 7.7 Hz, 1H), 6.64 (d, *J* = 7.4 Hz, 2H), 4.75 – 4.72 (m, 1H), 4.57 – 4.55 (m, 1H), 4.46 – 4.44 (m, 1H), 4.42 – 4.40 (m, 1H), 4.39 – 4.38 (m, 1H), 4.35 – 4.31 (m, 3H), 4.24 – 4.20 (m, 4H), 3.98 – 3.94 (m, 1H), 3.92 – 3.87 (m, 4H), 3.58 – 3.52 (m, 1H), 2.75 (s, 3H), 2.47 (d, *J* = 1.3 Hz, 3H), 2.36 – 2.29 (m, 2H), 1.82 – 1.71 (m, 1H), 0.96 (d, *J* = 5.9 Hz, 3H), 0.75 (d, *J* = 5.9 Hz, 3H). MS-ESI: *m/z* calculated for C<sub>47</sub>H<sub>50</sub>N<sub>6</sub>O<sub>7</sub>S<sub>2</sub>, Exact Mass: 874.32, found 875.1 [M + H]<sup>+</sup>.

## Scheme 3. Synthesis of compounds **5** and **7**

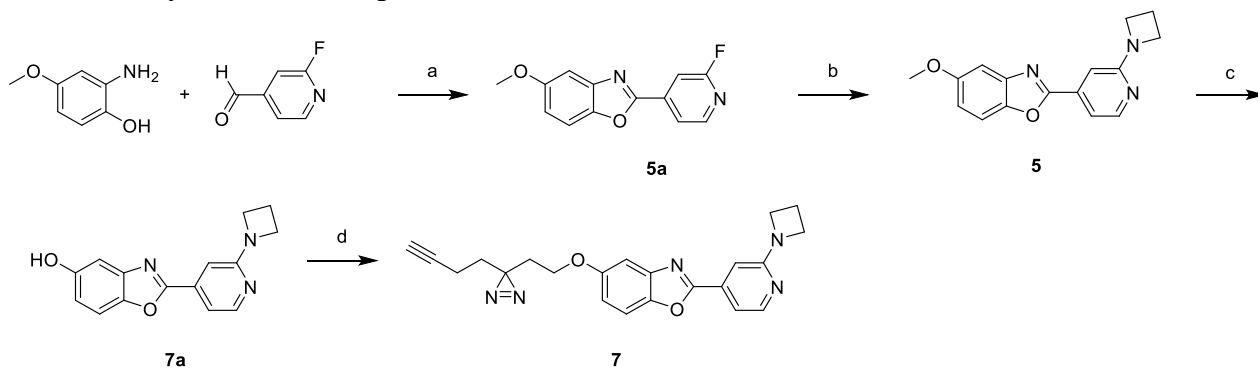

Reagent condition: a) TEA, DDQ, MeOH, DCM, room temperature (R.T.), 1 h; b) EtOH, 80°C, 12 h; c) BBr<sub>3</sub>, DCM, -78°C to room temperature (R.T.), N<sub>2</sub>, 3 h; d) Cs<sub>2</sub>CO<sub>3</sub>, MeCN, 50°C, 12 h.

## 2-(2-fluoropyridin-4-yl)-5-methoxybenzo[d]oxazole (5a)

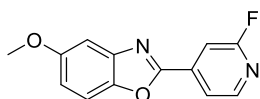

A solution of 2-amino-4-methoxyphenol (175 mg, 1.00 mmol) and 2-fluoroisonicotinaldehyde (250 mg, 2.00 mmol) in anhydrous MeOH (5 mL) was added TEA (0.31 mL, 2.4 mmol). After stirring for 30 min at room temperature, a solution of DDQ (227 mg, 1.00 mmol) in DCM (5 mL) was added

dropwise over 5 min. The resulting mixture was stirred at room temperature for an additional 30 min until completion. Then it was diluted by water (20 mL) and extracted with EA (3 × 15 mL). The combined organic layers were dried over anhydrous Na<sub>2</sub>SO<sub>4</sub>, filtered, and concentrated under reduced pressure. Then the crude product was purified by flash column chromatography on silica gel using a gradient eluent (PE/EA = 100:0 to 40:60). Compound **5a** was obtained by vacuum drying as pink solid (157 mg, 0.643 mmol) with a yield of 64.3%. MS-ESI: *m/z* calculated for C<sub>13</sub>H<sub>9</sub>FN<sub>2</sub>O<sub>2</sub>, Exact Mass: 244.06, found 245.1 [M + H]<sup>+</sup>.

### 2-(2-(azetidin-1-yl)pyridin-4-yl)-5-methoxybenzo[d]oxazole (5)

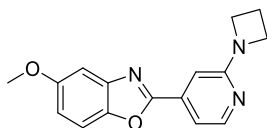

A solution of compound **5a** (122 mg, 0.50 mmol) and azetidine (57 mg, 1.00 mmol) in anhydrous EtOH (5 mL) was stirred at 80°C for 12 h. After cooling to room temperature, the reaction mixture was diluted by water (20 mL) and extracted with EA (3 × 15 mL). The combined organic layers were dried over anhydrous Na<sub>2</sub>SO<sub>4</sub>, filtered, and concentrated under reduced pressure. Then the crude product was purified by flash column chromatography on silica gel using a gradient eluent (PE/EA = 100:0 to 70:30). Compound **5** was obtained by vacuum drying as yellow solid (125 mg, 0.444 mmol) with a yield of 88.9%. <sup>1</sup>H NMR (400 MHz, DMSO-*d*<sub>6</sub>) δ 8.22 (d, *J* = 5.8 Hz, 1H), 7.76 (d, *J* = 9.0 Hz, 1H), 7.42 (d, *J* = 2.6 Hz, 1H), 7.33 (d, *J* = 5.7 Hz, 1H), 7.17 – 7.07 (m, 2H), 4.17 (t, *J* = 7.5 Hz, 4H), 3.84 (s, 3H), 2.46 – 2.36 (m, 2H). MS-ESI: *m/z* calculated for C<sub>16</sub>H<sub>15</sub>N<sub>3</sub>O<sub>2</sub>, Exact Mass: 281.12, found 282.0 [M + H]<sup>+</sup>.

### 2-(2-(azetidin-1-yl)pyridin-4-yl)benzo[d]oxazol-5-ol (7a)

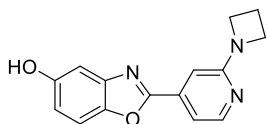

A solution of compound **5** (84 mg, 0.300 mmol) in anhydrous DCM (5 mL) was added BBr<sub>3</sub> (0.6 mL, 1 M in DCM) at -78°C under N<sub>2</sub> atmosphere. After complete addition, the reaction mixture was allowed to warm to room temperature and stirred for 3 h, The reaction was quenched by careful addition to ice-water (20 mL), followed by extraction with DCM (3 × 15 mL). The combined organic layers were

dried over anhydrous Na<sub>2</sub>SO<sub>4</sub>, filtered, and concentrated under reduced pressure. The crude product was purified by flash column chromatography on silica gel using a gradient eluent (DCM/EA =100:0 to 10:90). Compound **7a** was obtained by vacuum drying as a yellow solid (53 mg, 0.199 mmol) with a yield of 66.2%. MS-ESI: m/z calculated for C<sub>15</sub>H<sub>13</sub>N<sub>3</sub>O<sub>2</sub>, Exact Mass: 267.10, found 268.1 [M + H]<sup>+</sup>.

**2-(2-(azetidin-1-yl)pyridin-4-yl)-5-(2-(3-(but-3-yn-1-yl)-3H-diazirin-3-yl)ethoxy)benzo[d]oxazole (7)**

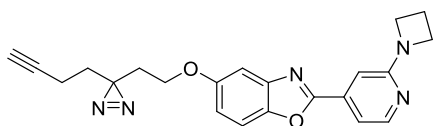

A solution of 2-(3-(but-3-yn-1-yl)-3H-diazirin-3-yl)ethyl 4-methylbenzenesulfonate (14 mg, 0.045 mmol) and compound **7a** in anhydrous MeCN (1 mL) was added Cs<sub>2</sub>CO<sub>3</sub> (29 mg, 0.090 mmol). The reaction mixture was stirred at 50°C for 12 h, then diluted with a H<sub>2</sub>O/DMSO mixture and purified by high-performance liquid chromatography using a gradient eluent (H<sub>2</sub>O/MeCN = 90:10 to 25:75). Compound **7** was obtained by lyophilization as white solid (3.0 mg, 0.008 mmol) with a yield of 17.2%. <sup>1</sup>H NMR (400 MHz, DMSO-*d*<sub>6</sub>) δ 8.81 (d, *J* = 2.1 Hz, 1H), 8.17 (dd, *J* = 8.7, 1.9 Hz, 1H), 7.62 (d, *J* = 8.9 Hz, 1H), 7.27 (d, *J* = 2.1 Hz, 1H), 6.94 (dd, *J* = 8.7, 2.3 Hz, 1H), 6.53 (d, *J* = 8.9 Hz, 1H), 4.11 (t, *J* = 7.4 Hz, 4H), 3.89 (t, *J* = 6.0 Hz, 2H), 2.85 (t, *J* = 2.4 Hz, 1H), 2.42 – 2.36 (m, 2H), 2.06 (td, *J* = 7.3, 2.3 Hz, 2H), 1.91 (t, *J* = 5.9 Hz, 2H), 1.69 (t, *J* = 7.4 Hz, 2H). MS-ESI: m/z calculated for C<sub>22</sub>H<sub>21</sub>N<sub>5</sub>O<sub>2</sub>, Exact Mass: 387.17, found 388.2 [M + H]<sup>+</sup>.

**Scheme 4. Synthesis of compounds HQY1027**

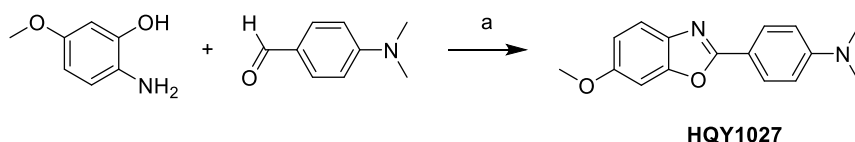

Reagent condition: a) TEA, DDQ, MeOH, DCM, room temperature (R.T.), 1 h.

**4-(6-methoxybenzo[d]oxazol-2-yl)-N-methylaniline (HQY1027)**

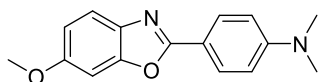

A solution of 4-dimethylaminobenzaldehyde (298 mg, 2.00 mmol) and 2-amino-5-methoxyphenol (175 mg, 1.00 mmol) in anhydrous MeOH (5 mL) were added TEA (0.31 mL, 2.4 mmol). After stirring for 30 min at room temperature, a solution of DDQ (227 mg, 1.00 mmol) in DCM (5 mL) was added dropwise over 5 min. The resulting mixture was stirred at room temperature for an additional 30 min until completion. Then it was diluted by water (20 mL) and extracted with EA (3 × 15 mL). The combined organic layers were dried over anhydrous Na<sub>2</sub>SO<sub>4</sub>, filtered, and concentrated under reduced pressure. Then the residue was purified by C18 flash column chromatography using a gradient eluent (H<sub>2</sub>O/MeCN = 100:0 to 20:80, H<sub>2</sub>O contains 0.05% HCl). **HQY1027** was obtained by lyophilization as yellow solid (166 mg, 0.617 mmol) with a yield of 61.7%. <sup>1</sup>H NMR (400 MHz, DMSO-*d*<sub>6</sub>) δ 7.94 (d, *J* = 8.5 Hz, 2H), 7.56 (d, *J* = 8.6 Hz, 1H), 7.34 (s, 1H), 6.93 (d, *J* = 8.8 Hz, 1H), 6.85 (d, *J* = 8.7 Hz, 2H), 3.82 (s, 3H), 3.03 (s, 6H). MS-ESI: *m/z* calculated for C<sub>16</sub>H<sub>16</sub>N<sub>2</sub>O<sub>2</sub>, Exact Mass: 268.12, found 269.1 [M + H]<sup>+</sup>.

### Scheme 5. Synthesis of compounds 8 – 10

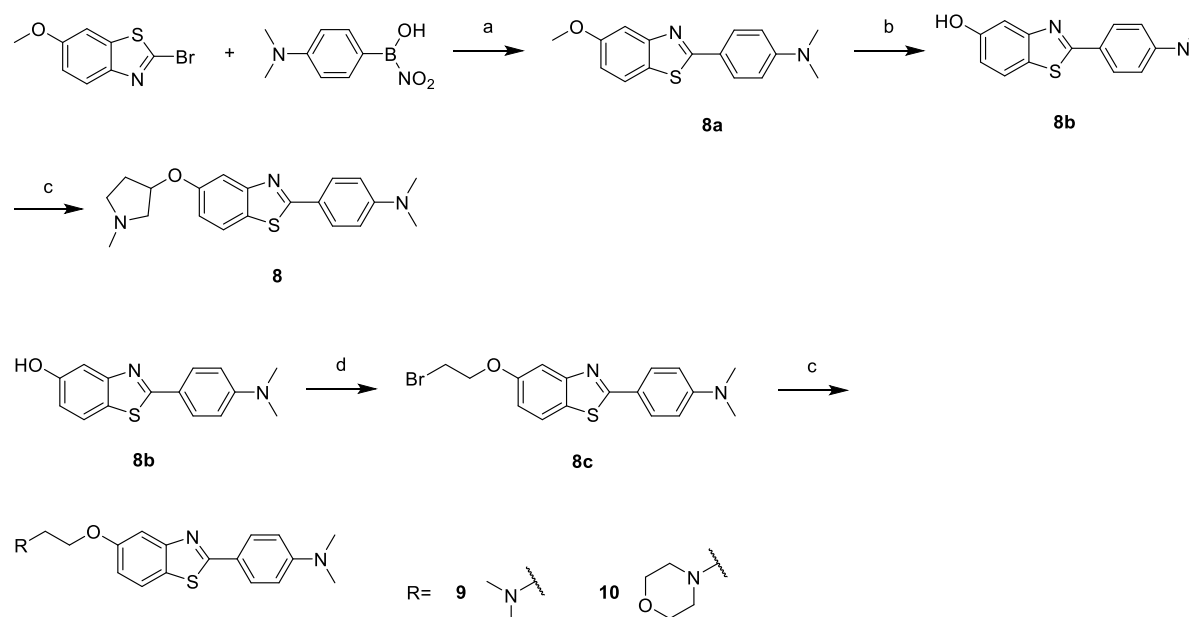

Reagent condition: a) Pd(dppf)<sub>2</sub>Cl<sub>2</sub>, K<sub>2</sub>CO<sub>3</sub>, Dioxane. H<sub>2</sub>O, 80°C, N<sub>2</sub>, 4 h; b) BBr<sub>3</sub>, DCM, -78°C to 35°C, N<sub>2</sub>, 3 h; c) K<sub>2</sub>CO<sub>3</sub>, MeCN, 70°C, 12 h; d) K<sub>2</sub>CO<sub>3</sub>, MeCN, 70°C, 12 h.

### 4-(6-methoxybenzo[d]thiazol-2-yl)-N,N-dimethylaniline (8a)

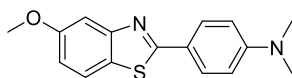

**8a**

A mixture of 2-bromo-6-methoxybenzo[*d*]thiazole (242 mg, 1 mmol), (4-(dimethylamino)phenyl)boronic acid (165 mg, 1 mmol) and K<sub>2</sub>CO<sub>3</sub> (207 mg, 1.5 mmol) was dissolved in dioxane (5 mL) and water (1 mL) in a pressure-resistant vessel. After the addition of Pd(dppf)<sub>2</sub>Cl<sub>2</sub> (36.5 mg, 0.05 mmol), the reaction mixture was stirred at 80°C under a nitrogen atmosphere for 4 h. Then it was diluted by water (20 mL) and extracted with EA (3 × 15 mL). The combined organic layers were dried over anhydrous Na<sub>2</sub>SO<sub>4</sub>, filtered, and concentrated under reduced pressure. The residue was purified by silica gel column chromatography using a gradient eluent (PE/EA = 100:0 to 70:30) to afford **8a** (72 mg, 0.2667 mmol) as a yellow solid in 26.7% yield. MS-ESI: *m/z* calculated for C<sub>16</sub>H<sub>16</sub>N<sub>2</sub>OS, Exact Mass: 284.10, found 285.1 [M + H]<sup>+</sup>.

### 2-(4-(dimethylamino)phenyl)benzo[*d*]thiazol-5-ol (**8b**)

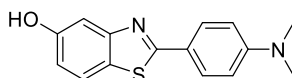

**8b**

To a solution of **8a** (137 mg, 0.482 mmol) in DCM (5 mL) was added dropwise a solution of boron tribromide in DCM (1 M, 964 μL) under a nitrogen atmosphere at -78°C. Then the reaction mixture was warmed to 35°C and stirred for 3 h. Upon completion, the reaction was quenched with 20 mL ice water and extracted with DCM (3 × 15 mL). The combined organic layers were dried over anhydrous Na<sub>2</sub>SO<sub>4</sub>, filtered, and concentrated under reduced pressure. The residue was purified by silica gel column chromatography using a gradient eluent (DCM/MeOH = 100:0 to 80:20) to afford **8b** (112 mg, 0.415 mmol) as a yellow solid in 86.1% yield. MS-ESI: *m/z* calculated for C<sub>15</sub>H<sub>14</sub>N<sub>2</sub>OS, Exact Mass: 270.08, found 271.1 [M + H]<sup>+</sup>.

### *N,N*-dimethyl-4-(5-((1-methylpyrrolidin-3-yl)oxy)benzo[*d*]thiazol-2-yl)aniline (**8**)

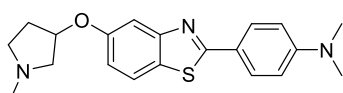

**8**

To a solution of **8b** (5.4 mg, 0.02 mmol) and 3-bromo-1-methylpyrrolidine (16.3 mg, 0.10 mmol) were

dissolved in MeCN (1 mL), then K<sub>2</sub>CO<sub>3</sub> (5.5 mg, 0.04 mmol) was added, and the reaction mixture was stirred at 70°C for 12 h. Upon completion, the mixture was filtered and purified by C18 flash column chromatography using a gradient eluent (H<sub>2</sub>O/MeCN = 100:0 to 35:65, H<sub>2</sub>O contains 0.05% TFA). **8** was obtained by lyophilization as yellow solid (3.1 mg, 0.009 mmol) with a yield of 43.9%. <sup>1</sup>H NMR (400 MHz, DMSO-*d*<sub>6</sub>) δ 7.87 (s, 1H), 7.84 (d, *J* = 8.1 Hz, 2H), 7.69 (s, 1H), 7.09 (d, *J* = 7.9 Hz, 1H), 6.82 (d, *J* = 8.8 Hz, 2H), 5.27 – 5.16 (m, 1H), 3.02 (s, 6H), 2.98 – 2.94 (m, 1H), 2.92 – 2.85 (m, 2H), 2.70 – 2.59 (m, 1H), 2.51 (s, 3H), 2.39 – 2.27 (m, 1H), 2.20 – 2.05 (m, 1H). MS-ESI: *m/z* calculated for C<sub>20</sub>H<sub>23</sub>N<sub>3</sub>OS, Exact Mass: 353.16, found 354.1 [M + H]<sup>+</sup>.

#### 4-(5-(2-bromoethoxy)benzo[*d*]thiazol-2-yl)-*N,N*-dimethylaniline (**8c**)

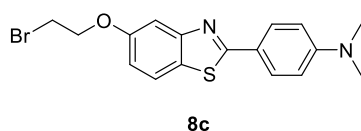

To a solution of **8b** (27 mg, 0.1 mmol) and 1,2-dibromoethane (31 mg, 0.12 mmol) were dissolved in MeCN (1 mL), then Cs<sub>2</sub>CO<sub>3</sub> (65 mg, 0.2 mmol) was added, and the reaction mixture was stirred at 70°C for 12 h. Then it was diluted by water (20 mL) and extracted with EA (3 × 15 mL). The combined organic layers were dried over anhydrous Na<sub>2</sub>SO<sub>4</sub>, filtered, and concentrated under reduced pressure. The residue was purified by silica gel column chromatography using a gradient eluent (DCM/EA = 100:0 to 0:100) to afford **8c** (32 mg, 0.0851 mmol) as a gray solid in 85.1% yield. MS-ESI: *m/z* calculated for C<sub>17</sub>H<sub>17</sub>BrN<sub>2</sub>OS, Exact Mass: 376.02, found 377.1 [M + H]<sup>+</sup>.

#### 4-(5-(2-(dimethylamino)ethoxy)benzo[*d*]thiazol-2-yl)-*N,N*-dimethylaniline (**9**)

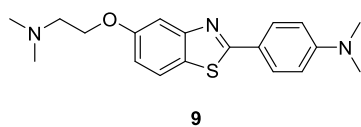

To a solution of **8c** (5.4 mg, 0.02 mmol) and dimethylamine (1.3 mg, 0.03 mmol) were dissolved in MeCN (1 mL), then K<sub>2</sub>CO<sub>3</sub> (5.5 mg, 0.04 mmol) was added, and the reaction mixture was stirred at 70°C for 12 h. Upon completion, the mixture was filtered and purified by C18 flash column chromatography using a gradient eluent (H<sub>2</sub>O/MeCN = 100:0 to 35:65, H<sub>2</sub>O contains 0.05% TFA). **9** was obtained by lyophilization as yellow solid (2.0 mg, 0.006 mmol) with a yield of 29.3%. <sup>1</sup>H NMR

(400 MHz, DMSO-*d*<sub>6</sub>)  $\delta$  7.88 (s, 1H), 7.84 (d, *J* = 8.8 Hz, 2H), 7.72 (s, 1H), 7.14 (d, *J* = 8.8 Hz, 1H), 6.82 (d, *J* = 8.7 Hz, 2H), 4.44 – 4.33 (m, 2H), 3.59 – 3.55 (m, 2H), 3.02 (s, 6H), 2.89 (s, 6H). MS-ESI: *m/z* calculated for C<sub>19</sub>H<sub>23</sub>N<sub>3</sub>OS, Exact Mass: 341.16, found 342.1 [M + H]<sup>+</sup>.

### *N,N*-dimethyl-4-(5-(2-morpholinoethoxy)benzo[*d*]thiazol-2-yl)aniline (**10**)

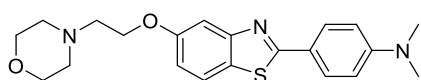

**10**

To a solution of **8c** (5.4 mg, 0.02 mmol) and morpholine (2.6 mg, 0.03 mmol) were dissolved in MeCN (1 mL), then K<sub>2</sub>CO<sub>3</sub> (5.5 mg, 0.04 mmol) was added, and the reaction mixture was stirred at 70°C for 12 h. Upon completion, the mixture was filtered and purified by C18 flash column chromatography using a gradient eluent (H<sub>2</sub>O/MeCN = 100:0 to 35:65, H<sub>2</sub>O contains 0.05% TFA). **10** was obtained by lyophilization as yellow solid (2.5 mg, 0.007 mmol) with a yield of 32.6%. <sup>1</sup>H NMR (400 MHz, DMSO-*d*<sub>6</sub>)  $\delta$  7.88 (s, 1H), 7.84 (d, *J* = 9.3 Hz, 2H), 7.73 (d, *J* = 2.4 Hz, 1H), 7.15 (dd, *J* = 8.9, 2.5 Hz, 1H), 6.82 (d, *J* = 9.0 Hz, 2H), 4.46 – 4.41 (m, 2H), 4.03 – 3.98 (m, 2H), 3.75 – 3.62 (m, 4H), 3.59 – 3.50 (m, 2H), 3.28 – 3.18 (m, 2H), 3.02 (s, 6H). MS-ESI: *m/z* calculated for C<sub>21</sub>H<sub>25</sub>N<sub>3</sub>O<sub>2</sub>S, Exact Mass: 383.17, found 384.1 [M + H]<sup>+</sup>.

### Scheme 6. Synthesis of compounds **11** – **13**

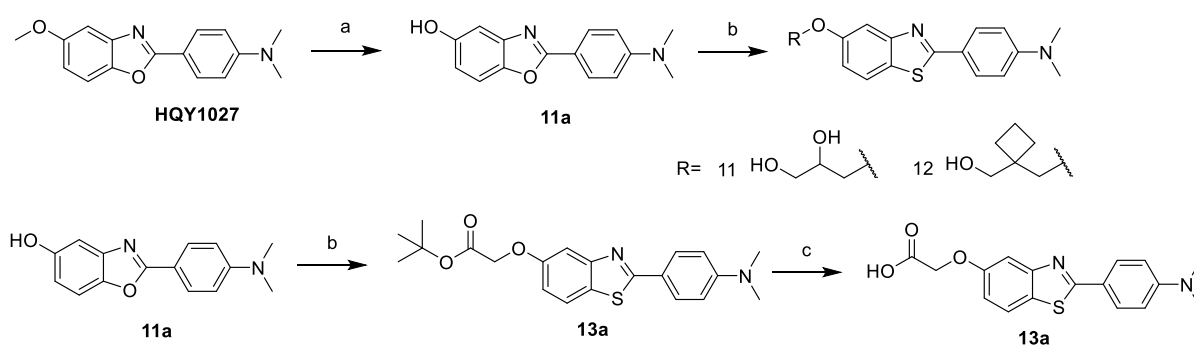

Reagent condition: a) BBr<sub>3</sub>, DCM, -78°C to 35°C, N<sub>2</sub>, 3 h; b) Cs<sub>2</sub>CO<sub>3</sub>, MeCN, 70°C, 12 h; c) TFA, DCM, room temperature (R.T.), 3 h.

### 2-(4-(dimethylamino)phenyl)benzo[*d*]oxazol-6-ol (**11a**)

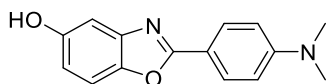

11a

To a solution of **HQY1027** (67 mg, 0.25 mmol) in DCM (5 mL) was added dropwise a solution of boron tribromide in DCM (1 M, 500  $\mu$ L) under a nitrogen atmosphere at  $-78^{\circ}\text{C}$ . Then the reaction mixture was warmed to  $35^{\circ}\text{C}$  and stirred for 3 h. Upon completion, the reaction was quenched with 20 mL ice water and extracted with DCM ( $3 \times 15$  mL). The combined organic layers were dried over anhydrous  $\text{Na}_2\text{SO}_4$ , filtered, and concentrated under reduced pressure. The residue was purified by silica gel column chromatography using a gradient eluent (DCM/MeOH = 100:0 to 80:20) to afford compound **11a** (55 mg, 0.217 mmol) as a yellow solid in 86.6% yield. MS-ESI:  $m/z$  calculated for  $\text{C}_{15}\text{H}_{14}\text{N}_2\text{O}_2$ , Exact Mass: 254.11, found 255.1  $[\text{M} + \text{H}]^+$ .

### 3-((2-(4-(dimethylamino)phenyl)benzo[d]oxazol-6-yl)oxy)propane-1,2-diol (**11**)

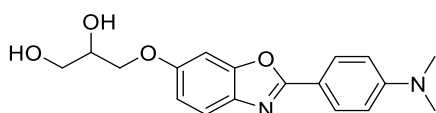

11

To a solution of **11a** (5.1 mg, 0.02 mmol) and 3-bromopropane-1,2-diol (6.1 mg, 0.04 mmol) were dissolved in MeCN (1 mL), then  $\text{Cs}_2\text{CO}_3$  (13 mg, 0.04 mmol) was added, and the reaction mixture was stirred at  $70^{\circ}\text{C}$  overnight. Upon completion, the mixture was filtered and purified by C18 flash column chromatography using a gradient eluent ( $\text{H}_2\text{O}/\text{MeCN} = 100:0$  to 25:75,  $\text{H}_2\text{O}$  contains 0.05% TFA). **11** was obtained by lyophilization as yellow solid (3.3 mg, 0.007 mmol) with a yield of 32.6%.  $^1\text{H}$  NMR (400 MHz,  $\text{DMSO}-d_6$ )  $\delta$  7.94 (d,  $J = 8.9$  Hz, 2H), 7.55 (d,  $J = 8.6$  Hz, 1H), 7.32 (d,  $J = 2.0$  Hz, 1H), 6.94 (dd,  $J = 8.6, 2.1$  Hz, 1H), 6.85 (d,  $J = 8.9$  Hz, 2H), 4.07 (dd,  $J = 9.8, 3.9$  Hz, 1H), 3.96 – 3.92 (m, 1H), 3.61 – 3.55 (m, 1H), 3.52 – 3.46 (m, 1H), 3.83 (d,  $J = 5.1$  Hz, 1H), 3.03 (s, 6H). MS-ESI:  $m/z$  calculated for  $\text{C}_{18}\text{H}_{20}\text{N}_2\text{O}_4$ , Exact Mass: 328.14, found 329.1  $[\text{M} + \text{H}]^+$ .

### (1-(((2-(4-(dimethylamino)phenyl)benzo[d]oxazol-6-yl)oxy)methyl)cyclobutyl)methanol (**12**)

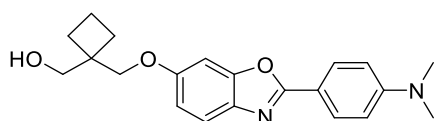

12

To a solution of **11a** (5.1 mg, 0.02 mmol) and 3-(bromomethyl)-3-oxetanemethanol (7.2 mg, 0.04 mmol) were dissolved in MeCN (1 mL), then Cs<sub>2</sub>CO<sub>3</sub> (13 mg, 0.04 mmol) was added, and the reaction mixture was stirred at 70°C overnight. Upon completion, the mixture was filtered and purified by C18 flash column chromatography using a gradient eluent (H<sub>2</sub>O/MeCN = 100:0 to 25:75, H<sub>2</sub>O contains 0.05% TFA). **12** was obtained by lyophilization as yellow solid (2.8 mg, 0.008 mmol) with a yield of 39.5%. <sup>1</sup>H NMR (400 MHz, DMSO-*d*<sub>6</sub>) δ 7.94 (d, *J* = 8.9 Hz, 2H), 7.56 (d, *J* = 8.7 Hz, 1H), 7.39 (d, *J* = 2.0 Hz, 1H), 6.97 (dd, *J* = 8.6, 2.2 Hz, 1H), 6.85 (d, *J* = 8.9 Hz, 2H), 4.43 (q, *J* = 5.9 Hz, 4H), 4.22 (s, 2H), 3.73 (s, 2H), 3.03 (s, 6H). MS-ESI: *m/z* calculated for C<sub>20</sub>H<sub>22</sub>N<sub>2</sub>O<sub>4</sub>, Exact Mass: 354.16, found 355.1 [M + H]<sup>+</sup>.

***tert*-butyl 2-((2-(4-(dimethylamino)phenyl)benzo[d]oxazol-6-yl)oxy)acetate (**13a**)**

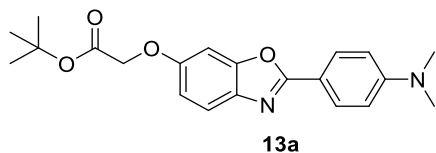

To a solution of **11a** (10.2 mg, 0.04 mmol) and *tert*-butyl 2-bromoacetate (11.7 mg, 0.06 mmol) were dissolved in MeCN (1 mL), then Cs<sub>2</sub>CO<sub>3</sub> (19.5 mg, 0.06 mmol) was added, and the reaction mixture was stirred at 70°C overnight. Upon completion, the mixture was filtered and purified by C18 flash column chromatography using a gradient eluent (H<sub>2</sub>O/MeCN = 100:0 to 10:90, H<sub>2</sub>O contains 0.05% TFA). **13a** was obtained by lyophilization as yellow solid (7.8 mg, 0.021 mmol) with a yield of 52.9%. MS-ESI: *m/z* calculated for C<sub>21</sub>H<sub>24</sub>N<sub>2</sub>O<sub>4</sub>, Exact Mass: 368.17, found 369.1 [M + H]<sup>+</sup>.

**2-((2-(4-(dimethylamino)phenyl)benzo[d]oxazol-6-yl)oxy)acetic acid (**13**)**

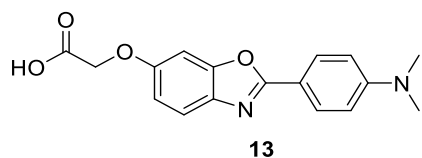

To a solution of **13a** (7.8 mg, 0.021 mmol) were dissolved in DCM (4 mL), then TFA (1 mL) was added, and the reaction mixture was stirred at room temperature for 3 h. Upon completion, the mixture was filtered, and concentrated under reduced pressure, then purified by C18 flash column chromatography using a gradient eluent (H<sub>2</sub>O/MeCN = 100:0 to 35:65, H<sub>2</sub>O contains 0.05% TFA). **13** was obtained by lyophilization as yellow solid (3.4 mg, 0.011 mmol) with a yield of 51.9%. <sup>1</sup>H NMR

(400 MHz, DMSO-*d*<sub>6</sub>)  $\delta$  7.94 (d,  $J = 7.0$  Hz, 2H), 7.57 (d,  $J = 6.7$  Hz, 1H), 7.32 (s, 1H), 6.95 (d,  $J = 8.7$  Hz, 1H), 6.85 (d,  $J = 7.2$  Hz, 2H), 4.76 (s, 2H), 3.03 (s, 6H). MS-ESI:  $m/z$  calculated for C<sub>17</sub>H<sub>16</sub>N<sub>2</sub>O<sub>4</sub>, Exact Mass: 312.11, found 313.1 [M + H]<sup>+</sup>.
